# Supplementary material for: Weaning from mechanical ventilation in people with neuromuscular disease: a systematic review
Source: PubMed Central journal article supplement — BMJ Open. 2021 Sep 14;11(9):e047449. doi: 10.1136/bmjopen-2020-047449 (PMC8442075; doi:10.1136/bmjopen-2020-047449), 2021-09-14
Supplement: bmjopen-2020-047449.draft_revisions.pdf [file bmjopen-2020-047449.draft_revisions.pdf]

# BMJ Open

BMJ Open is committed to open peer review. As part of this commitment we make the peer review history of every article we publish publicly available.

When an article is published we post the peer reviewers' comments and the authors' responses online. We also post the versions of the paper that were used during peer review. These are the versions that the peer review comments apply to.

The versions of the paper that follow are the versions that were submitted during the peer review process. They are not the versions of record or the final published versions. They should not be cited or distributed as the published version of this manuscript.

BMJ Open is an open access journal and the full, final, typeset and author-corrected version of record of the manuscript is available on our site with no access controls, subscription charges or pay-per-view fees (<http://bmjopen.bmj.com>).

If you have any questions on BMJ Open's open peer review process please email [info.bmjopen@bmj.com](mailto:info.bmjopen@bmj.com)

# BMJ Open

## Weaning from mechanical ventilation in people with neuromuscular disease: systematic review

|                               |                                                                                                                                                                                                                                                                                                                                                                                                                                                                           |
|-------------------------------|---------------------------------------------------------------------------------------------------------------------------------------------------------------------------------------------------------------------------------------------------------------------------------------------------------------------------------------------------------------------------------------------------------------------------------------------------------------------------|
| Journal:                      | <i>BMJ Open</i>                                                                                                                                                                                                                                                                                                                                                                                                                                                           |
| Manuscript ID                 | bmjopen-2020-047449                                                                                                                                                                                                                                                                                                                                                                                                                                                       |
| Article Type:                 | Original research                                                                                                                                                                                                                                                                                                                                                                                                                                                         |
| Date Submitted by the Author: | 03-Dec-2020                                                                                                                                                                                                                                                                                                                                                                                                                                                               |
| Complete List of Authors:     | Bernardes Neto, Saint Clair; Universidade Federal do Rio Grande do Norte, RENORBIO – Biotechnology<br>Torres, Rodrigo; University of Chile, Physiotherapy; Universidad de Chile Lima, Íllia; Federal University of Rio Grande do Norte, Department of Physical Therapy<br>Resqueti, Vanessa; Federal University of Rio Grande do Norte, Department of Physical Therapy<br>Fregonezi, Guilherme; Federal University of Rio Grande do Norte, Department of Physical Therapy |
| Keywords:                     | Neuromuscular disease < NEUROLOGY, RESPIRATORY MEDICINE (see Thoracic Medicine), INTENSIVE & CRITICAL CARE                                                                                                                                                                                                                                                                                                                                                                |
|                               |                                                                                                                                                                                                                                                                                                                                                                                                                                                                           |

SCHOLARONE™  
Manuscripts

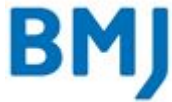

I, the Submitting Author has the right to grant and does grant on behalf of all authors of the Work (as defined in the below author licence), an exclusive licence and/or a non-exclusive licence for contributions from authors who are: i) UK Crown employees; ii) where BMJ has agreed a CC-BY licence shall apply, and/or iii) in accordance with the terms applicable for US Federal Government officers or employees acting as part of their official duties; on a worldwide, perpetual, irrevocable, royalty-free basis to BMJ Publishing Group Ltd ("BMJ") its licensees and where the relevant Journal is co-owned by BMJ to the co-owners of the Journal, to publish the Work in this journal and any other BMJ products and to exploit all rights, as set out in our [licence](#).

The Submitting Author accepts and understands that any supply made under these terms is made by BMJ to the Submitting Author unless you are acting as an employee on behalf of your employer or a postgraduate student of an affiliated institution which is paying any applicable article publishing charge ("APC") for Open Access articles. Where the Submitting Author wishes to make the Work available on an Open Access basis (and intends to pay the relevant APC), the terms of reuse of such Open Access shall be governed by a Creative Commons licence – details of these licences and which [Creative Commons](#) licence will apply to this Work are set out in our licence referred to above.

Other than as permitted in any relevant BMJ Author's Self Archiving Policies, I confirm this Work has not been accepted for publication elsewhere, is not being considered for publication elsewhere and does not duplicate material already published. I confirm all authors consent to publication of this Work and authorise the granting of this licence.

## Weaning from mechanical ventilation in people with neuromuscular disease: systematic review

Saint Clair G Bernardes Neto<sup>1</sup>, Rodrigo Torres Castro<sup>2</sup>, Íllia Lima<sup>3</sup>, Vanessa R Resqueti<sup>3</sup>, Guilherme A F Fregonezi<sup>3</sup>

<sup>1</sup>RENORBIO – Biotechnology, Universidade Federal do Rio Grande do Norte, Natal, Brazil

<sup>2</sup>Physiotherapy, University of Chile, Santiago, Chile

<sup>3</sup>Department of Physical Therapy, Federal University of Rio Grande do Norte, Natal, Brazil

Correspondence to Saint Clair Gomes Bernardes Neto; netosam@gmail.com

### ABSTRACT

**Objective:** This systematic review aimed in assessing the effects of different weaning protocols in people with neuromuscular disease (NMD) receiving invasive mechanical ventilation searching for the best one and how different protocols can affect outcomes as weaning success, duration of weaning, intensive care unit and hospital stay and mortality. **Design:** Systematic review. **Data sources:** Electronic databases (MEDLINE, EMBASE, Web of Science and Scopus) were searched from January 2009 up to August 2020. **Eligibility criteria for selecting studies:** Randomized controlled trials (RCT) and quasi-RCTs that evaluated NMD patients (adults and children from 5 years old) in the weaning process managed with a protocol (pressure support ventilation; synchronized intermittent mandatory ventilation; CPAP; “T” piece). **Primary outcome:** Weaning success. **Secondary outcomes:** weaning duration; ICU stay; hospital stay; ICU mortality; complications (pneumothorax, ventilation associated pneumonia). **Data extraction and synthesis:** Two review authors assessed the titles and the abstracts for inclusion independently. **Results:** We found no studies that fulfilled the inclusion criteria. **Conclusions:** The absence of studies about different weaning protocols for NMD patients does not allow concluding the superiority of any specific weaning protocol for patients with NMD or determining the impact of different types of protocols on other outcomes. The result of this review encourages further studies. **PROSPERO registration number:** CRD42019117393.

**Keywords:** mechanical ventilation; ventilator weaning; neuromuscular disease

## STRENGTHS AND LIMITATIONS OF THIS STUDY

- This study will help searches to develop new researches about mechanical ventilation weaning in neuromuscular disease patients, trying to identify the best way to deal with it.
- This study has highlighted that neuromuscular patients are usually not managed with conventional protocols for mechanical ventilation weaning.
- No studies were identified about the protocols proposed to be studied in this population.
- No conclusions could be made based on the lack of evidence about the subject searched.

## INTRODUCTION

Neuromuscular disease (NMD) can be defined as a chronic and progressive disease, which may present with different clinical characteristics, in which its pattern is based on the location where the injury occurs in a motor unit.<sup>1,2</sup> NMD are characterized by progressive muscular impairment, with difficulty in ambulation, swallowing and ventilation, with progressive reduction of vital capacity and increased work of breathing.<sup>3</sup> These changes lead to the development of acute and chronic respiratory failure, which is an important cause of prolonged ventilatory dependence<sup>4,5</sup>, associated with increased healthcare costs.<sup>6</sup>

Three main components may contribute to respiratory failure and the need for mechanical ventilation in these patients: (1) inspiratory muscle weakness; (2) expiratory muscle weakness; (3) upper airway compromise.<sup>7-9</sup> The NMD patients experience this respiratory impairment, in general, by a large proportion of motor units that innervate the respiratory muscles affected.<sup>2</sup>

The majority of critically ill patients admitted to ICU require ventilatory support for acute or chronic respiratory failure,<sup>3</sup> specially the NMD ones.<sup>8,10-12</sup> In addition, the pattern of neuromuscular abnormalities associated with critical illness, defined as ICU-acquired weakness (ICUAW), can lead to prolonged mechanical ventilation, a longer hospital stay and increased ventilation.<sup>4</sup>

1  
2  
3 The emergence of respiratory symptoms, with progressive hypercapnia,  
4 can lead to death from respiratory failure.<sup>3,7</sup> Long-term invasive or non-invasive  
5 mechanical ventilation is the main intervention for people who present with  
6 acute respiratory acidosis; progressive decline in vital capacity (<10–15 mL/kg);  
7 or progressive decline in maximal inspiratory pressure (<20–30 cmH<sub>2</sub>O).<sup>3,8,13</sup>  
8  
9

10  
11  
12 Weaning from mechanical ventilation is the process of transition to  
13 spontaneous ventilation.<sup>14</sup> In people with NMD, conventional weaning is  
14 generally not possible.<sup>15</sup> Weaning difficulty may occur in different populations,  
15 such as elderly with prolonged ICU hospitalization, people with chronic  
16 respiratory diseases or NMD.<sup>16</sup> Therefore, the decision to progress to  
17 extubation is more challenging in this group of people with advanced respiratory  
18 muscle weakness, and this can lead to a need for tracheostomy and prolonged  
19 mechanical ventilation.<sup>4</sup>  
20  
21  
22  
23  
24  
25

26 The weaning process may be conducted in different protocols such as  
27 the following:  
28  
29

- 30 • 'T' piece: in which the patient receives only supplemental oxygen through  
31 a T-shaped tube connected to an endotracheal tube (orotracheal or  
32 tracheostomy).<sup>14</sup>  
33  
34
- 35 • Continuous positive airway pressure (CPAP): the weaning protocol  
36 involves using a continuous pressure, equal to the previous positive end-  
37 expiratory pressure level used before.<sup>14</sup>  
38  
39
- 40 • Pressure support: the use of progressive lower levels of inspiratory  
41 pressure support until it reaches 5–8 cmH<sub>2</sub>O.<sup>14</sup>  
42  
43  
44  
45

46 Successful weaning is defined as the ability to maintain spontaneous  
47 ventilation without the need for reintubation and invasive mechanical ventilation  
48 for 48 hours after extubation.<sup>14</sup> For patients with NMD, due to the difficulty of  
49 weaning, it may be also defined as the absence of a need for tracheostomy and  
50 mechanical ventilation for 5 days after extubation.<sup>4</sup>  
51  
52  
53

54  
55 Post weaning monitoring should observe whether two of the following  
56 findings are present: respiratory acidosis (pH <7.35; PaCO<sub>2</sub>>45 mm Hg);  
57 SpO<sub>2</sub><90% or PaO<sub>2</sub><60 mm Hg with FiO<sub>2</sub>>50%; RR >35 rpm; decreased level  
58 of consciousness, restlessness or excessive sweating; or signs suggestive of  
59  
60

1  
2  
3 respiratory muscle fatigue, such as the use of accessory muscles or paradoxical  
4 movement of the abdomen, in order to determinate the need to re-establish  
5 mechanical ventilation again.<sup>4,14</sup>  
6  
7

8  
9 Weaning failure from invasive ventilation is frequent in people with NMD  
10 due to muscle weakness and gradual hypercapnia.<sup>4</sup> In this way, the non-  
11 invasive ventilation, even after weaning failure, is an option. And a future  
12 weaning can be conducted when and if clinically possible.<sup>4,16,17</sup> Although this  
13 whole process significantly increases health costs with this patient population.  
14  
15  
16  
17

## 18 19 20 **Objectives**

21  
22 The aim of this systematic review was to assess the effects of different  
23 weaning protocols in people with NMD receiving invasive mechanical  
24 ventilation. Our secondary aim was to assess how the different protocols affect  
25 weaning success, duration of weaning, duration of stay in the ICU, duration of  
26 hospital stay, ICU mortality and also to assess adverse effects.  
27  
28  
29  
30  
31  
32

## 33 34 **METHODS**

### 35 36 **Protocol and registration**

37  
38 This systematic review was registered on PROSPERO (Registration  
39 Number: CRD42019117393. The review authors followed the Cochrane  
40 Handbook for Systematic Reviews of Interventions<sup>18</sup> and the PRISMA  
41 Statement.<sup>19</sup>  
42  
43  
44  
45  
46  
47

### 48 49 **Eligibility criteria for inclusion**

#### 50 51 ***Population***

52 Adults (above 16 years old) and children (from 5 to 16 years old) people  
53 with a clinical diagnosis of a NMD (muscular dystrophy of any origin including  
54 Duchenne muscular dystrophy, amyotrophic lateral sclerosis, congenital  
55 myasthenia, myasthenia gravis, congenital myopathy, spinal muscular atrophy,  
56 Guillian Barré Syndrome, severe inherited neuropathies, metabolic myopathies  
57  
58  
59  
60

1  
2  
3 (Pompe disease), inflammatory myopathies and mitochondrial diseases) of any  
4 gender.  
5

6  
7 All patients ventilated for at least 48 hours with orotracheal tube or  
8 tracheostomy because of acute respiratory failure, and considered by  
9 physicians to be ready for weaning according to clinical criteria and weaning  
10 parameters. No patients with other respiratory or cardiovascular clinical  
11 diagnosis associated were considered, nor patients with mixed NMD diagnosis.  
12  
13  
14  
15  
16

### 17 18 **Intervention**

19  
20 The intervention assessed was the process of weaning from mechanical  
21 ventilation in people with NMD using a protocol with criteria for deciding if the  
22 patient is ready for extubation with 30 min to 2 hours SBT at the end point of the  
23 protocol. The following protocols were considered for inclusion:  
24  
25  
26

27  
28 1. Pressure support ventilation, with gradual reduction of the support  
29 pressure.  
30

31  
32 2. Synchronized intermittent mandatory ventilation, with gradual  
33 reduction of respiratory rate and support pressure.  
34

35  
36 3. CPAP, with gradual reduction of applied pressure.  
37

38  
39 4. 'T' piece, with progressive increase of spontaneous ventilation time.  
40  
41

### 42 43 **Comparison**

44  
45 Any comparison between the different protocols was considered. If the  
46 studies classified the weaning based on the outcomes: simple (successful after  
47 first attempt of spontaneous breathing trial); difficult (requiring up to three  
48 attempts or less than 7 days to reach success; prolonged (requiring more than 7  
49 days to reach success), comparisons would also be considered.  
50  
51  
52  
53  
54  
55  
56  
57  
58  
59  
60



## ***Outcomes***

### ***Primary outcome***

Weaning success, defined as the ability to maintain spontaneous ventilation without the need for reintubation and invasive mechanical ventilation for 48 hours after extubation.<sup>14</sup>

### ***Secondary outcomes***

- Duration of weaning in patients with acute and prolonged mechanical ventilation - defined as the time between the weaning protocol initiation and the moment of extubation.
- Duration of ICU stay in patients with acute and prolonged mechanical ventilation - defined as the time between ICU admission and ICU discharge.
- Duration of hospital stay in patients with acute and prolonged mechanical ventilation - defined as the time between hospital admission and hospital discharge.
- ICU mortality rate in patients with acute and prolonged mechanical ventilation - defined as the mortality rate during ICU stay.
- Incidence of pneumothorax during mechanical ventilation period.
- Incidence of ventilation associated pneumonia.

### ***Study designs***

To ensure this evidence synthesis is based upon the highest quality of evidence, we only considered including randomized controlled trials (RCTs) and quasi-RCTs (experimental study with participants subjected to some type of intervention or control group, and with the same outcome of interest measured). There were no restrictions to language in the studies selection.

## Search method

Electronic databases were searched from 1<sup>st</sup> January 2009 up to 31<sup>st</sup> August 2020: Cochrane Neuromuscular Specialised Register (The Cochrane Library, current issues), MEDLINE, EMBASE, Web of Science and Scopus. We will also searched the United States National Institutes of Health Clinical Trials Registry, ClinicalTrials.gov (ClinicalTrials.gov) and the WHO International Clinical Trials Registry Portal (apps.who.int/trialsearch/).

Search terms included were: 'neuromuscular disease' or all other terms compatible with clinical diagnoses of these types of diseases, such as 'muscular dystrophy', 'Duchenne muscular dystrophy', 'amyotrophic lateral sclerosis', 'congenital myasthenia', 'myasthenia gravis', 'congenital myopathy', 'spinal muscular atrophy', 'Guillain Barré Syndrome', 'severe inherited neuropathies', 'metabolic myopathies', 'Pompe disease', 'inflammatory myopathies' and 'mitochondrial diseases' combined with 'mechanical ventilation' or 'artificial respiration' or 'mechanical ventilation weaning' or 'ventilator weaning' or 'respirator weaning' and all the combination between them. The search strategy is available as an online supplementary file.

## Study selection

Two review authors (SCBN and IL) performed the search. Two review authors (SCBN and RTC) assessed the titles and the abstracts for inclusion independently and induplicate. When the full text was assessed for eligibility criteria it was performed independently as well, and the authors had an excellent agreement of 99,5%. The disagreements were resolved through consultation of a third review author (IL).

## RESULTS

After searching scrutinously all the databases proposed from January 2009 to August 2020 no studies fulfilled the inclusion criteria regarding different weaning protocols on neuromuscular disease patients receiving mechanical

1  
2  
3 ventilation for respiratory failure. A flowchart shows the detailed process of  
4 selection (Fig1).  
5

6  
7 **Fig1. Flowchart showing publication selection.**<sup>19</sup>  
8  
9

## 10 11 **DISCUSSION**

12  
13 We found no high quality evidence either for or against any of the  
14 weaning protocols proposed (PSV, SIMV, CPAP or 'T' piece) in MND patients  
15 under mechanical ventilation.  
16  
17

18  
19 The decision about the ideal time to extubate these patients and wean  
20 them from ventilatory support is much harder for the patients that deal with  
21 respiratory muscle weakness and chronic ventilatory failure, increasing  
22 repeated extubation fails and tracheotomies rates.<sup>17</sup>  
23  
24

25  
26 According to the studies observed during the search, weaning has been  
27 studied and applied to this population in any of the aforementioned types of  
28 protocols. But the results are not satisfactory for any of them, with high failure  
29 rates in the process anyway.  
30  
31

32  
33 The search for the best way to promote weaning from mechanical  
34 ventilation for the population of patients with NMD has led professionals and  
35 researchers to focus on the use of NIV as a way of progressing and continuing  
36 weaning from MV.<sup>17,20</sup> This type of approach is justified by the absence of  
37 studies with appropriate methodology that identify a better way to conduct  
38 weaning in these patients. The combination of NIV with invasive MV has led to  
39 a reduction in reintubation rates, despite the increase in the number of patients  
40 dependent on this therapy.<sup>17,21</sup> This observation was also described even for  
41 prolonged MV patients with NMD.<sup>20</sup>  
42  
43  
44  
45  
46  
47  
48  
49

50  
51 Although NIV has been described as an excellent alternative for weaning  
52 in patients who fail in the conventional conditions for evaluating weaning<sup>21</sup>  
53 (protocols proposed for analysis) it seems to be more efficient when installed  
54 immediately after MV removal and not after the appearance respiratory failure,  
55 when it would be, especially for patients with NMD, associated with a greater  
56 probability of failure and the need to return to invasive MV.<sup>17</sup>  
57  
58  
59  
60

1  
2  
3 Xu et al<sup>22</sup> observed, in a series of cases of infantile and juvenile patients  
4 with Pompe disease, that after conducting weaning in CPAP or PSV, the use of  
5 NIV immediately after extubation led to an improvement in respiratory muscle  
6 strength, with better respiratory conditions after extubation. But the result  
7 reported by the authors reinforces that the conventional assessment on  
8 weaning does not seem to be sufficient for patients with NMD.  
9

10  
11  
12  
13  
14 Another important consideration is that respiratory failure in patients with  
15 NMD is not only due to impaired respiratory muscle strength, but also due to  
16 bulbar dysfunction. Traditional methods of assessing the progression of  
17 weaning and extubation have important limitations in determining these  
18 changes. Craig et al even conditioned the removal of MV and placement in NIV  
19 for progression of the weaning to conventional parameters of spontaneous  
20 breathing conditions and also to safe bulbar function.<sup>20</sup>  
21  
22  
23  
24  
25

26 Lack of evidence of effectiveness, like in this case, is not evidence that  
27 the interventions are ineffective, simply means that there were no papers that  
28 met the criteria of methodological quality to be evaluated.  
29  
30  
31  
32  
33  
34

### 35 **Implications for practice**

36 We found no relevant evidence, so we can not make any  
37 recommendations about better weaning protocols for neuromuscular disease  
38 patients. The guidelines about ventilatory support management for NMD  
39 patients should be more explicit and clear about the basis of the  
40 recommendations regarding weaning protocols.  
41  
42  
43  
44  
45  
46  
47

### 48 **Implications for research**

49  
50 Given the high incidence of NMD patients requiring mechanical  
51 ventilation for acute or chronic respiratory failure<sup>10,11</sup> there is a lot of space for  
52 randomized controlled trials, with high methodological rigor to better define the  
53 best weaning protocol in this population to ensure better outcomes, mainly in  
54 the weaning success.  
55  
56  
57  
58  
59  
60

## CONCLUSION

The absence of studies presenting the proposed inclusion criteria does not allow concluding the superiority of any specific weaning protocol for patients with NMD or determining the impact of different types of protocols on other outcomes such as duration of mechanical ventilation and weaning, duration of ICU or hospital stay, mortality or complications.

The result of this review encourages other authors and researchers to develop specific research and with an adequate methodology in order to seek better answers on weaning protocols in this population.

## ACKNOWLEDGEMENTS

The authors thank the anonymous reviewers that contributed constructively to the manuscript.

We would also like to thank the members of PneumoCardioVascular Lab/HUOL and Laboratório de Inovação Tecnológica em Reabilitação from Universidade de Federal do Rio Grande do Norte in Brazil for their contribution in researches with neuromuscular disease patients.

## CONFLICTS OF INTERESTS

The authors have declared that no competing interests exist.

## AUTHOR STATEMENT

Data curation: SCBN; RTC.

Formal analysis: SCBN; RTC.

Methodology: SCBN; RTC; IL.

Resources: VRR; GAFF.

Writing - original draft: SCBN; RTC; GAFF.

Writing – review & editing: SCBN; RTC; IL; VRR; GAFF.

## FUNDING

The study received financial support from the Coordenação de Aperfeiçoamento de Pessoal de Nível Superior (CAPES) (<https://www.gov.br/cases/pt-br>), PGCI CAPES 054/2014 - 23038.007514/2014-78. GAFF received a grant from CNPq (<https://www.cnpq.br>) number 312876/2018-1, and VRR received a grant from CNPq (<https://www.cnpq.br>) number 315580/2018-6. The funders had no role in study design, data collection and analysis, decision to publish, or preparation of the manuscript.

## REFERENCES

1. Anziska Y, Sternberg A. Exercise in neuromuscular disease. *Muscle Nerve* 2013;48:3–20.
2. Rezania K, Goldenberg FD, White S. Neuromuscular disorders and acute respiratory failure: diagnosis and management. *Neurol Clin* 2012;30:161–85.
3. Ambrosino N, Carpenè N, Gherardi M. Chronic respiratory care for neuromuscular diseases in adults. *Eur Respir J* 2009;34:444–51.
4. Kim SM, Kang S-W, Choi Y-C, et al. Successful extubation after weaning failure by noninvasive ventilation in patients with neuromuscular disease: case series. *Ann Rehabil Med* 2017;41:450–5.
5. Cabrera Serrano M, and Rabinstein AA. Causes and outcomes of acute neuromuscular respiratory failure. *Archives of neurology* 67: 1089-1094, 2010.
6. Busl KM, Ouyang B, Boland TA, Pollandt S, Temes RE. Prolonged mechanical ventilation is associated with pulmonary complications, increased length of stay, and unfavorable discharge destination among patients with subdural hematoma. *J Neurosurg Anesthesiol.* 2015;27:31–6.
7. Benditt JO, and Boitano LJ. Pulmonary issues in patients with chronic neuromuscular disease. *American journal of respiratory and critical care medicine* 187: 1046-1055, 2013.

- 1  
2  
3 8. Racca F, Vianello A, Mongini T, Ruggeri P, Versaci A, Vita GL, and Vita G.  
4 Practical approach to respiratory emergencies in neurological diseases. 41:  
5 497-508, 2020.  
6  
7
- 8  
9 9. Vassilakopoulos T, Petrof BJ. Ventilator-Induced diaphragmatic dysfunction.  
10 Am J Respir Crit Care Med 2004;169:336–41.  
11
- 12  
13 10. Luo F, Annane D, Orlikowski D, He L, Yang M, Zhou M, and Liu GJ.  
14 Invasive versus non-invasive ventilation for acute respiratory failure in  
15 neuromuscular disease and chest wall disorders. The Cochrane database  
16 of systematic reviews 12: CD008380, 2017.  
17
- 18  
19 11. Schoser B, Fong E, Geberhiwot T, Hughes D, Kissel JT, Madathil SC,  
20 Orlikowski D, Polkey MI, Roberts M, Tiddens HA, and Young P. Maximum  
21 inspiratory pressure as a clinically meaningful trial endpoint for  
22 neuromuscular diseases: a comprehensive review of the literature.  
23 Orphanet Journal of Rare Diseases 12: 52, 2017.  
24
- 25  
26 12. Windisch W, Dellweg D, Geiseler J, et al. Prolonged weaning from  
27 mechanical ventilation: results from specialized weaning centers - a  
28 registry-based study from the WeanNet Initiative. Dtsch Arztebl Int.  
29 2020;117:197–204.  
30
- 31  
32 13. Chevrolet JC, Deléamont P. Repeated vital capacity measurements as  
33 predictive parameters for mechanical ventilation need and weaning success  
34 in the Guillain-Barré syndrome. Am Rev Respir Dis 1991;144:814–8.  
35
- 36  
37 14. Zein H, Baratloo A, Negida A, et al. Ventilator weaning and spontaneous  
38 breathing trials; an educational review. Emerg 2016;4:65–71.  
39
- 40  
41 15. Fan E, Cheek F, Chlan L, et al. An official American thoracic Society clinical  
42 practice guideline: the diagnosis of intensive care unit-acquired weakness in  
43 adults. Am J Respir Crit Care Med 2014;190:1437–46.  
44
- 45  
46 16. Tsara V, Moisiadis N, Antoniadou M, et al. Characteristics and outcome of  
47 patients with difficult weaning from mechanical ventilation: an 18 years'  
48 experience of a respiratory intermediate unit attached to a pulmonary  
49 department. Hippokratia. 2015;19:37–40.  
50  
51  
52  
53  
54  
55  
56  
57  
58  
59  
60

17. Kim SM, Kang SW, Choi YC, Park YG, Won YH. Successful Extubation After Weaning Failure by Noninvasive Ventilation in Patients With Neuromuscular Disease: Case Series. *Ann Rehabil Med*. 2017;41(3):450-455.
18. Higgins JPT, Green S, The Cochrane Collaboration. *Cochrane Handbook for systematic reviews of interventions*. version 5.1.0, 2011. Available: [www.cochrane-handbook.org](http://www.cochrane-handbook.org)
19. Moher D, Liberati A, Tetzlaff J, Altman DG, Group P. Preferred reporting items for systematic reviews and meta-analyses: the PRISMA statement. *J Clin Epidemiol*. 2009;62(10):1006–12.
20. Craig VJ, Ford V, Chakrabarti B, et al. Non Invasive Ventilation in the Weaning of Patients with Acute Guillain Barre Syndrome Requiring Invasive Ventilation. *Am J Respir Crit Care Med*. 2017;195:A3691.
21. Bach JR, Goncalves MR, Hamdani I, Winck JC. Extubation of patients with neuromuscular weakness: a new management paradigm. *Chest*. 2010;137:1033-9.
22. Xu L, Ba H, Pei Y, et al. Comprehensive approach to weaning in difficult-to-wean infantile and juvenile onset glycogen-storage disease type II patients: a case series. *Italian Journal of Pediatrics*. 2019;45:106.



1  
2  
3  
4  
5  
6  
7  
8  
9  
10  
11  
12  
13  
14  
15  
16  
17  
18  
19  
20  
21  
22  
23  
24  
25  
26  
27  
28  
29  
30  
31  
32  
33  
34  
35  
36  
37  
38  
39  
40  
41  
42  
43  
44  
45  
46  
47  
48  
49  
50  
51  
52  
53  
54  
55  
56  
57  
58  
59  
60

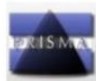

### PRISMA 2009 Flow Diagram

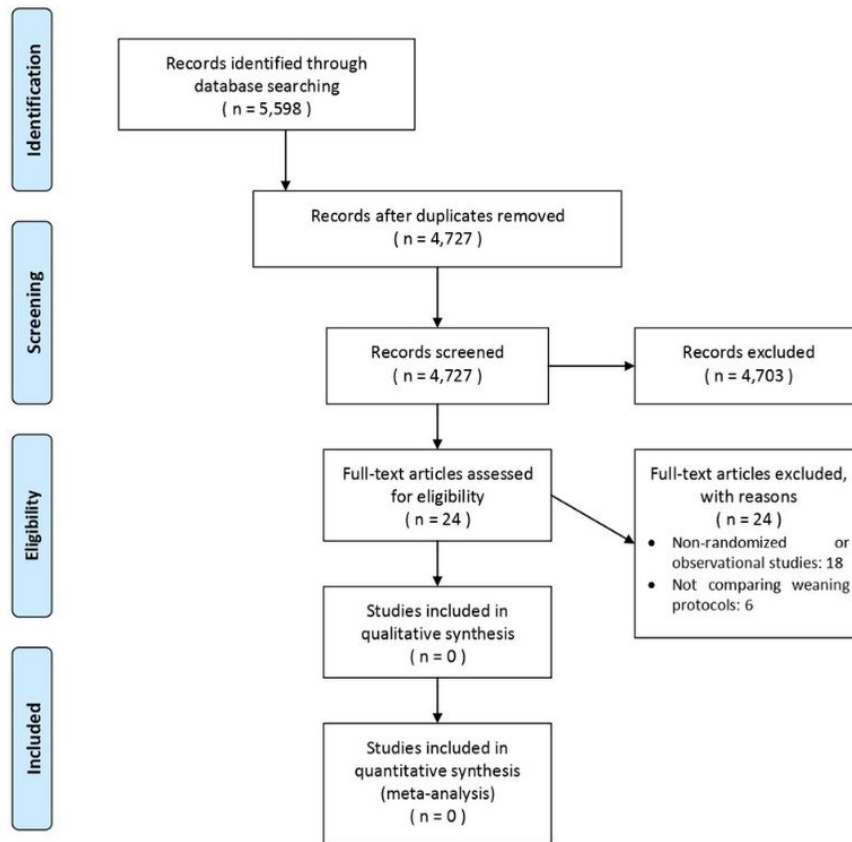

From: Moher D, Liberati A, Tetzlaff J, Altman DG, The PRISMA Group (2009). Preferred Reporting Items for Systematic Reviews and Meta-Analyses: The PRISMA Statement. PLoS Med 6(7): e1000097. doi: 10.1371/journal.pmed1000097

For more information, visit [www.prisma-statement.org](http://www.prisma-statement.org).

Fig1 - PRISMA Flow Diagram - BMJ Open

215x280mm (96 x 96 DPI)

# BMJ Open Weaning from mechanical ventilation in people with neuromuscular disease: protocol for a systematic review

Saint Clair Gomes Bernardes Neto <sup>1</sup>, Rodrigo Torres,<sup>2</sup> Íllia Lima,<sup>3</sup>  
Vanessa R Resqueti,<sup>3</sup> Guilherme A F Fregonezi<sup>3</sup>

**To cite:** Bernardes Neto SCG, Torres R, Lima Í, *et al*. Weaning from mechanical ventilation in people with neuromuscular disease: protocol for a systematic review. *BMJ Open* 2019;0:e029890. doi:10.1136/bmjopen-2019-029890

► Prepublication history and additional material for this paper are available online. To view these files, please visit the journal online (<http://dx.doi.org/10.1136/bmjopen-2019-029890>).

Received 12 March 2019  
Revised 09 September 2019  
Accepted 17 September 2019

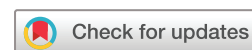

© Author(s) (or their employer(s)) 2019. Re-use permitted under CC BY-NC. No commercial re-use. See rights and permissions. Published by BMJ.

<sup>1</sup>RENORBIO – Biotechnology, Universidade Federal do Rio Grande do Norte, Natal, Brazil  
<sup>2</sup>Physiotherapy, University of Chile, Santiago, Chile  
<sup>3</sup>Department of Physical Therapy, Federal University of Rio Grande do Norte, Natal, Brazil

## Correspondence to

Saint Clair Gomes Bernardes Neto; netosam@gmail.com

## ABSTRACT

**Introduction** Neuromuscular diseases (NMD) are characterised by progressive muscular impairment. The muscle weakness is directly related to respiratory muscles weakness, causing reduction in vital capacity, especially when associated with mechanical ventilation (MV). Conventional MV weaning in NMD is generally difficult. Weaning process can be conducted in protocols such as: ‘T’ piece or Pressure Support Ventilator. Weaning failure is frequent because of muscle weakness. Protocol aim is to assess the effects of different weaning protocols in NMD patients receiving invasive MV in weaning success rate, duration of weaning, intensive care unit (ICU) stay, hospital stay and ICU mortality.

**Methods and analysis** A search will be carried in the Cochrane Neuromuscular Specialised Register, MEDLINE, EMBASE, Web of Science, Scopus, United States National Institutes of Health Clinical Trials Registry, ClinicalTrials.gov and WHO International Clinical Trial Registry Portal, of randomised controlled trials (RCTs) and quasi-RCTs. Inclusion criteria of individuals are adults (above 16 years old) and children (from 5 to 16 years old), with clinical diagnosis of NMD (muscular dystrophy, amyotrophic lateral sclerosis, congenital myasthenia, myasthenia gravis, congenital myopathy, spinal muscular atrophy, Guillain Barré Syndrome, severe inherited neuropathies, metabolic myopathies, inflammatory myopathies, mitochondrial diseases) of any gender. All patients ventilated for at least 48 hours due to respiratory failure and clinically considered ready for weaning. Other respiratory or cardiovascular diagnosis associated will not be included. Intervention assessed will be weaning from MV using a protocol with 30 min to 2 hours of spontaneous breathing trial at the end point. All comparisons of different protocols will be considered.

**Ethics and dissemination** Formal ethical approval is not required as primary data will not be collected, since it will be a systematic review. All studies included should have ethical committee approval. The results will be disseminated through a peer-reviewed publication and in conferences and congresses or symposia.

**PROSPERO registration number** CRD42019117393.

## INTRODUCTION

Neuromuscular disease (NMD) can be defined as a chronic and progressive disease, which may present with different clinical

## Strengths and limitations of this study

- This study will help to identify the best way to conduct mechanical ventilation (MV) weaning in patients with neuromuscular diseases (NMD), improving the outcomes of this population when using MV.
- It will be difficult to find articles that meet the inclusion criteria leading to greater difficulty for statistical analysis.
- There are very different approaches in the weaning process of patients with NMD, and that will bring difficult to compare the protocols.
- Too many NMD will need to be included because of NMD heterogeneity.

characteristics, in which its pattern is based on the location where the injury occurs in a motor unit.<sup>1 2</sup> NMD are characterised by progressive muscular impairment, with difficulty in ambulation, swallowing and ventilation, with progressive reduction of vital capacity and increased work of breathing.<sup>3</sup> These changes lead to the development of chronic respiratory insufficiency, which is an important cause of prolonged ventilatory dependence.<sup>4</sup>

Muscle weakness is directly related to weakness of respiratory muscles, especially the diaphragm. Diaphragmatic weakness, often found in patients with NMD causes a reduction in the capacity to generate force, especially when associated with the use of controlled mechanical ventilation.<sup>5</sup>

Intensive care unit (ICU) admission, regardless of the presence of NMD, may be a cause of neuromuscular disorders that lead to muscle impairment.<sup>6</sup> It is estimated that such a condition occurs in up to 62% of critically ill patients in the ICU.<sup>7</sup> The NMD patients experience this respiratory impairment, in general, by a large proportion of motor units that innervate the respiratory muscles affected.<sup>2</sup>

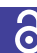

1 Some risk factors such as use of sedatives, malnutrition,  
2 systemic inflammation and prolonged mechanical  
3 ventilation may further impair the neuromuscular perfor-  
4 mance of people admitted to ICU.<sup>8</sup>

5 The majority of critically ill patients admitted to ICU  
6 require ventilatory support for acute or chronic respi-  
7 ratory failure,<sup>3</sup> specially the NMD ones. In addition,  
8 the pattern of neuromuscular abnormalities associ-  
9 ated with critical illness, defined as ICU-acquired  
10 weakness (ICUAW),<sup>4</sup> can lead to prolonged mechan-  
11 ical ventilation, a longer hospital stay and increased  
12 ventilation.<sup>4</sup>

13 The emergence of respiratory symptoms, with  
14 progressive hypercapnia, can lead to death from respi-  
15 ratory failure.<sup>3</sup> Long-term invasive or non-invasive  
16 mechanical ventilation is the main intervention for  
17 people who present with acute respiratory acidosis;  
18 progressive decline in vital capacity (<10–15 mL/kg);  
19 or progressive decline in maximal inspiratory pres-  
20 sure (<20–30 cmH<sub>2</sub>O).<sup>3,9</sup>

21 Weaning from mechanical ventilation is the process of  
22 transition to spontaneous ventilation.<sup>10</sup> In people with  
23 NMD, conventional weaning is generally not possible.<sup>11</sup>

24 Weaning difficulty may occur in different popula-  
25 tions, such as elderly with prolonged ICU hospital-  
26 isation, people with chronic respiratory diseases or  
27 NMD.<sup>12</sup> Therefore, the decision to progress to extuba-  
28 tion is more challenging in this group of people with  
29 advanced respiratory muscle weakness, and this can lead  
30 to a need for tracheostomy and prolonged mechanical  
31 ventilation.<sup>4</sup>

32 Difficult weaning can be defined as the requirement  
33 of up to three spontaneous breathing trials (SBT) in a  
34 period of no longer than 7 days of mechanical ventilation  
35 to achieve extubation.<sup>10,13</sup>

36 The weaning process may be conducted in different  
37 protocols such as the following:

- 38 ▶ ‘T’ piece: in which the patient receives only supple-  
39 mental oxygen through a T-shaped tube connected to  
40 an endotracheal tube (orotracheal or tracheostomy).<sup>10</sup>
- 41 ▶ Continuous positive airway pressure (CPAP): the  
42 weaning protocol involves using a continuous pres-  
43 sure, equal to the previous positive end-expiratory  
44 pressure level used before.<sup>10</sup>
- 45 ▶ Pressure support: the use of progressive lower levels  
46 of inspiratory pressure support until it reaches 5–8  
47 cmH<sub>2</sub>O.<sup>10</sup>

48 Successful weaning is defined as the ability to maintain  
49 spontaneous ventilation without the need for reintubation  
50 and invasive mechanical ventilation for 48 hours after extu-  
51 bation.<sup>10</sup> For patients with NMD, due to the difficulty of  
52 weaning, it may be also defined as the absence of a need for  
53 tracheostomy and mechanical ventilation for 5 days after  
54 extubation.<sup>4</sup>

55 Postweaning monitoring should observe whether two  
56 of the following findings are present: respiratory acidosis  
57 (pH <7.35; PaCO<sub>2</sub> >45 mm Hg); SpO<sub>2</sub> <90% or PaO<sub>2</sub> <60  
58 mm Hg with FiO<sub>2</sub> >50%; RR >35 rpm; decreased level of

consciousness, restlessness or excessive sweating; or signs  
suggestive of respiratory muscle fatigue, such as the use  
of accessory muscles or paradoxical movement of the  
abdomen, in order to determinate the need to re-estab-  
lish mechanical ventilation again.<sup>4,10</sup>

Weaning failure from invasive ventilation is frequent  
in people with NMD due to muscle weakness and  
gradual hypercapnia.<sup>4</sup> In this way, the non-invasive ven-  
tilation, even after weaning failure, is an option. And a  
future weaning can be conducted when and if clinically  
possible.<sup>4,12</sup> Although this whole process significantly  
increases health costs with this patient population.

## Objectives

The aim of this systematic review is to assess the effects of  
different weaning protocols in people with NMD receiving  
invasive mechanical ventilation. Our secondary aim is to  
assess how the different protocols affect weaning success,  
duration of weaning, duration of stay in the ICU, duration  
of hospital stay, ICU mortality and also to assess adverse  
effects.

## METHODS

### Eligibility criteria

Studies will be selected according to the criteria outlined  
below.

### Study designs

We will include randomised controlled trials (RCTs) and  
quasi-RCTs (experimental study with participants subjected  
to some type of intervention or control group, and with  
the same outcome of interest measured. But in this kind  
of study, also known as non-randomised trial, populations  
are subjected to any of the groups using other methods of  
allocating, usually not truly random). Other study types,  
such as non-randomised trials, crossover studies and case-  
control studies will be described in the ‘Discussion’ section  
of the review, but they will not be included in the Results  
section. We will include studies reported as full-text, those  
published as abstract only and unpublished data. There will  
be no restrictions as to language.

### Participants

We will consider for inclusion adults (above 16 years  
old) and children (from 5 to 16 years old) people with a  
clinical diagnosis of a NMD (muscular dystrophy of any  
origin including Duchenne muscular dystrophy, amy-  
otrophic lateral sclerosis, congenital myasthenia, myas-  
thenia gravis, congenital myopathy, spinal muscular  
atrophy, Guillian Barré Syndrome, severe inherited  
neuropathies, metabolic myopathies (Pompe disease),  
inflammatory myopathies and mitochondrial diseases)  
of any gender.

We will consider all patients ventilated for at least 48  
hours with orotracheal tube or tracheostomy because  
of acute respiratory failure, and considered by physi-  
cians to be ready for weaning according to clinical

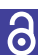

criteria and weaning parameters. No patients with other respiratory or cardiovascular clinical diagnosis associated will be included, nor patients with mixed NMD diagnosis.

If any subset of participants with NMD is analysed, these patients will be included.

### Interventions

The intervention assessed will be the process of weaning from mechanical ventilation in people with NMD using a protocol with criteria for deciding if the patient is ready for extubation with 30 min to 2 hours SBT at the end point of the protocol.

We will consider the following protocols for inclusion.

1. Pressure support ventilation, with gradual reduction of the support pressure.
2. Synchronised intermittent mandatory ventilation, with gradual reduction of respiratory rate and support pressure.
3. CPAP, with gradual reduction of applied pressure.
4. 'T' piece, with progressive increase of spontaneous ventilation time.

### Comparators

We will consider any comparisons of the different protocols.

The protocols will also be compared in relation to the classification of weaning outcomes, in order to identify which protocols develop better outcomes.

- ▶ Simple—successful after first attempt.
- ▶ Difficult—require up to three attempts (or less than 7 days to reach success).
- ▶ Prolonged—require more than 7 days to reach success.

### Outcomes

#### Primary outcome

Weaning success is defined as the ability to maintain spontaneous ventilation without the need for reintubation and invasive mechanical ventilation for 48 hours after extubation.<sup>10</sup>

#### Secondary outcomes

- ▶ Duration of weaning in patients with acute and prolonged mechanical ventilation—defined as the time between the weaning protocol initiation and the moment of extubation.
- ▶ Duration of ICU stay in patients with acute and prolonged mechanical ventilation—defined as the time between ICU admission and ICU discharge.
- ▶ Duration of hospital stay in patients with acute and prolonged mechanical ventilation—defined as the time between hospital admission and hospital discharge.
- ▶ ICU mortality rate in patients with acute and prolonged mechanical ventilation—defined as the mortality rate during ICU stay.
- ▶ Incidence of pneumothorax during mechanical ventilation period.

- ▶ Incidence of ventilation associated pneumonia.

### Language

We will include articles reported in English and other languages. There will be no restrictions.

### Information sources

#### Electronic searches

We will search the Cochrane Neuromuscular Specialised Register (The Cochrane Library, current issues), MEDLINE, EMBASE, Web of Science and Scopus. We will scan conference abstracts for relevant studies.

We will also search the United States National Institutes of Health Clinical Trials Registry, ClinicalTrials.gov (ClinicalTrials.gov) and the WHO International Clinical Trials Registry Portal (apps.who.int/trialsearch/).

We will search all databases from January 2009 to December 2019, and we will impose no restriction on language of publication.

We will identify non-randomised studies for inclusion in the discussion from the same search results.

We will search reference lists of all relevant and included trials and review articles for additional references. We will search for errata or retractions of included trials. We will also search relevant manufacturers' websites for trial information. And we will search grey literature, in reports of technical research and projects related to government programme, to identify other studies.

We will contact study authors of included trials to identify additional trials whether published or unpublished.

If no RCTs or quasi-RCTs in this area are not found, the authors will review other well-designed observational studies, where the population (NMD), intervention (mechanical ventilation weaning) and outcome (weaning success) are clearly documented, in the 'Discussion' section of the review. We will identify these (non-randomised studies) via a search in MEDLINE (from inception to the present), EMBASE (from inception to the present), Web of Science (from inception to the present) and Scopus (from inception to the present). This will be done in order to give a comprehensive descriptive narrative of any non-randomised data.

### Search strategy

Search terms will include: 'neuromuscular disease' or all other terms compatible with clinical diagnoses of these types of diseases, such as 'muscular dystrophy', 'Duchenne muscular dystrophy', 'amyotrophic lateral sclerosis', 'congenital myasthenia', 'myasthenia gravis', 'congenital myopathy', 'spinal muscular atrophy', 'Guilian Barré Syndrome', 'severe inherited neuropathies', 'metabolic myopathies', 'Pompe disease', 'inflammatory myopathies' and 'mitochondrial diseases' combined with 'mechanical ventilation' or 'artificial respiration' or 'mechanical ventilation weaning' or 'ventilator weaning' or 'respirator weaning' and all the combination between them.

An example of the search strategy is available as a online supplementary file.





## Study records

### Selection of studies

Two review authors (SCBN and RTC) will independently screen titles and abstracts of all the potential studies retrieved by the search for inclusion and code them as 'retrieve' (eligible or potentially eligible/unclear) or 'do not retrieve'. We will identify and exclude duplicates and collate multiple reports of the same study so that each study rather than each report is the unit of interest in the review. We will retrieve full-text study reports/publications, and two review authors (SCBN and RTC) will independently screen the full text and identify studies for inclusion, and identify and record reasons for exclusion of the ineligible studies.

We will resolve any disagreements through discussion or, if required, through consultation with a third review author (GAFF).

We will report the selection process in sufficient detail to complete a Preferred Reporting Items for Systematic Review and Meta-Analysis Protocols flow diagram and 'Characteristics of excluded studies' table.

### Data extraction and management

We will use a data extraction form that we will initially pilot on at least one trial included in the review to collect study characteristics and outcome data. One review author (SCBN) will extract study characteristics from included trials. We will collect information on study design and setting, participant characteristics (including disease severity and age), study eligibility criteria, details of the intervention(s) given, the outcomes assessed, the source of study funding and any conflicts of interest stated by the investigators.

Two review authors (SCBN and RTC) will independently extract outcome data from included trials. We will note in the 'Characteristics of included studies' table if the trials did not report outcome data in a usable way. We will resolve any disagreements by consensus or consult a third review author (GAFF). One review author (SCBN) will transfer data into Review Manager (RevMan) V.5.3.<sup>14</sup> A second review author (RTC) will check the outcome data entries.

The same review author (RTC) will spot-check study characteristics for accuracy against the trial report. When reports require translation, the translator will extract data directly using a data extraction form. To minimise bias in the review process, the review authors will not screen studies for inclusion, extract data, or assess the risk of bias in trials they themselves have authored. In such circumstances, we will involve a third review author (GAFF).

### Risk of bias individual studies

Two review authors (SCBN and RTC) will independently assess risk of bias for each study using the criteria outlined in the Cochrane Handbook for Systematic Reviews of Interventions.<sup>15</sup> These authors will resolve disagreements by discussion or by involving another review author (GAFF).

We will assess the risk of bias according to the following domains:

1. Random sequence generation.
2. Allocation concealment.
3. Blinding of participants and personnel.
4. Blinding of outcome assessment.
5. Incomplete outcome data.
6. Selective outcome reporting.
7. Other bias.

We will grade each potential source of bias as high, low or unclear and provide a quote from the study report together with a justification for our judgement in the 'Risk of bias' table. We will summarise the risk of bias judgements across different studies for each of the domains listed. We will consider blinding separately for different key outcomes where necessary (eg, for unblinded outcome assessment, risk of bias for all-cause mortality may be very different than for a patient-reported pain scale). Where information on risk of bias relates to unpublished data or correspondence with a trialist, we will note this in the 'Risk of bias' table. When considering treatment effects, we will take into account the risk of bias for the studies that contribute to that outcome.

If we are able to pool a sufficient number of studies, that is, more than 10 trials,<sup>15</sup> we will create and examine a funnel plot to explore possible small study biases.

### Data synthesis

#### Measures of treatment effect

We will analyse dichotomous data as risk ratios (RR) with corresponding 95% CI and continuous data as mean difference (MD) with 95% CI, or as standardised mean difference with 95% CI for results across studies with outcomes that are conceptually the same but measured in different ways. We will enter data presented as a scale with a consistent direction of effect.

We will undertake meta-analyses only where this is meaningful, that is if the treatments, participants and the underlying clinical question are similar enough for pooling to make sense. This will be identified if there are two or more trials with comparable populations and interventions.

Where a single trial reports multiple trial arms, we will include only the arms relevant to the review question.

All data will be pooled according to age group, dividing them into two groups (adults—over 16 years old, and children—between 5 and 16 years old). After this grouping, the analysis will be done, first, comparing the success rate and failure rate in each of the groups. Subsequently, the data will also be evaluated taking into consideration the weaning outcomes in simple, difficult and prolonged (as described in the types of interventions).

#### Unit of analysis issues

We do not expect to have any crossover or cluster randomised controlled trials, since weaning is a one-off event and also due to the lack of control group, since all

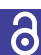

patients are submitted to the same intervention, which is weaning from mechanical ventilation.

If we are able to find cluster randomised controlled trials with different clusters of different NMD, we will conduct this analysis.

### Assessment of heterogeneity

We will use the  $I^2$  statistic to measure heterogeneity among the trials in each analysis. If we identify substantial unexplained heterogeneity, we will report random-effects results and explore possible causes by prespecified subgroup analysis.

We will be following the rough guide to interpretation outlined in the Cochrane Handbook for Systematic Reviews of Interventions.

- ▶ 0%–40%: might not be important;
- ▶ 30%–60%: may represent moderate heterogeneity;
- ▶ 50%–90%: may represent substantial heterogeneity and
- ▶ 75%–100%: considerable heterogeneity.

### Data synthesis

If the review includes more than one comparison that cannot be included in the same analysis, we will report the results for each comparison separately.

### 'Summary of findings' table

- ▶ We will create a 'Summary of findings' table using the following outcomes.
- ▶ Weaning success.
- ▶ Duration of weaning (time difference between weaning protocol initiation and the moment of extubation moment).
- ▶ Duration of ICU stay.
- ▶ Duration of hospital stay.
- ▶ ICU mortality rate in patients with acute and prolonged mechanical ventilation—defined as the mortality rate during ICU stay.
- ▶ Incidence of pneumothorax during mechanical ventilation period.
- ▶ Incidence of ventilation associated pneumonia.

We will use the five GRADE considerations (study limitations, consistency of effect, imprecision, indirectness and publication bias) to assess the quality of a body of evidence (studies that contribute data for the prespecified outcomes). We will use methods and recommendations described in the Cochrane Handbook for Systematic Reviews of Interventions<sup>15</sup> using GRADEpro software (GRADEpro GDT). We will justify all decisions to downgrade or upgrade the quality of studies using footnotes, and we will make comments to aid readers' understanding of the review where necessary. Two authors will independently grade the quality of the evidence. They will resolve disagreements by discussion and by consultation with a third review author.

### Subgroup analysis and investigation of heterogeneity

- ▶ We plan to perform the following subgroup analyses.
- ▶ Simple weaning: successful after first attempt.

- ▶ Difficult weaning: require up to three attempts.
- ▶ Prolonged weaning: require more than 7 days to reach success.
- ▶ Children: from 5 to 16 years old.
- ▶ Adults: above 16 years old.

We will use both primary and secondary outcome measures in all subgroup analyses. We will use the formal test for subgroup interactions in Review Manager V.5.3.<sup>14</sup>

### Sensitivity analysis

We plan to undertake the following sensitivity analyses.

3wRepeat the analysis by excluding studies at high risk of bias (sequence generation, allocation concealment, blinding of personnel, outcome assessment and attrition).

If there are one or more very large trials, we will repeat the analysis by excluding them to examine how much they dominate the results.

### Reaching conclusions

We will base our review conclusions only on findings from the quantitative or narrative synthesis of included trials. We will avoid making recommendations for practice. Our implications for research will suggest priorities for future research and outline the remaining uncertainties in the area.

### Patient and public involvement

In the present protocol of systematic review and in the subsequent systematic review, there will be no involvement of patients or public.

The paper proposes to use results previously authorised and published by other authors, without there being any need for patient or public involvement. The research question was developed based on the questions raised by other authors, most of the time according to the clinical difficulty and necessity of improving the weaning protocols for this population.

The results of the present study will be published in indexed journal so it can be available for NMD patients, in general, and public, specially health professionals.

### CONCLUSION

This systematic review will provide evidence in different weaning protocols that can be applied to the NMD patients, analysing the weaning success rate, leading to extubation. The hypothesis is that one specific protocol has higher success weaning rates.

Where sufficient data are available, we will conduct a meta-analysis to confirm the relationship between the different protocols and duration of weaning, duration of stay in the ICU, duration of hospital stay and ICU mortality. It will also be able to assess adverse effects of weaning protocols that fail to lead to extubation.

Moreover, if the hypothesis is confirmed, the review will clarify the reasons any weaning strategy interfere to higher success weaning rates.



Overall, the review will complement the evidence based on mechanical ventilation weaning for NMD patients.

**Contributors** SCBN: screen titles, abstracts and full text to identify studies for inclusion or exclusion; extract study characteristics; extract outcome data; transfer data into RevMan; assess risk of bias. RTC: screen titles, abstracts and full text to identify studies for inclusion or exclusion; extract outcome data; check outcome data entries; spot-check study characteristics for accuracy; assess risk of bias. IL: development of the text; statistical analysis and revision of the final text. VRR: development of the text; statistical analysis, revision of the final text. GAFF: discussion about the disagreements the two authors have in any issues; screen studies the other two authors have authored.

**Funding** The authors have not declared a specific grant for this research from any funding agency in the public, commercial or not-for-profit sectors.

**Competing interests** None declared.

**Patient consent for publication** Not required.

**Provenance and peer review** Not commissioned; externally peer reviewed.

**Open access** This is an open access article distributed in accordance with the Creative Commons Attribution Non Commercial (CC BY-NC 4.0) license, which permits others to distribute, remix, adapt, build upon this work non-commercially, and license their derivative works on different terms, provided the original work is properly cited, appropriate credit is given, any changes made indicated, and the use is non-commercial. See: <http://creativecommons.org/licenses/by-nc/4.0/>.

#### ORCID iD

Saint Clair Gomes Bernardes Neto <http://orcid.org/0000-0001-5089-0564>

#### REFERENCES

- Anziska Y, Sternberg A. Exercise in neuromuscular disease. *Muscle Nerve* 2013;48:3–20.
- Rezania K, Goldenberg FD, White S. Neuromuscular disorders and acute respiratory failure: diagnosis and management. *Neurol Clin* 2012;30:161–85.
- Ambrosino N, Carpenè N, Gherardi M. Chronic respiratory care for neuromuscular diseases in adults. *Eur Respir J* 2009;34:444–51.
- Kim SM, Kang S-W, Choi Y-C, *et al*. Successful extubation after weaning failure by noninvasive ventilation in patients with neuromuscular disease: case series. *Ann Rehabil Med* 2017;41:450–5.
- Vassilakopoulos T, Petrof BJ. Ventilator-Induced diaphragmatic dysfunction. *Am J Respir Crit Care Med* 2004;169:336–41.
- Bach JR, Gonçalves MR, Hamdani I, *et al*. Extubation of patients with neuromuscular weakness. *Chest* 2010;137:1033–9.
- Epstein SK, Ciubotaru RL. Independent effects of etiology of failure and time to reintubation on outcome for patients failing extubation. *Am J Respir Crit Care Med* 1998;158:489–93.
- Hermans G, Van den Berghe G. Clinical review: intensive care unit acquired weakness. *Critical Care* 2015;19:274–83.
- Chevrolet JC, Deléamont P. Repeated vital capacity measurements as predictive parameters for mechanical ventilation need and weaning success in the Guillain-Barré syndrome. *Am Rev Respir Dis* 1991;144:814–8.
- Zein H, Baratloo A, Negida A, *et al*. Ventilator weaning and spontaneous breathing trials; an educational review. *Emerg* 2016;4:65–71.
- Fan E, Cheek F, Chlan L, *et al*. An official American thoracic Society clinical practice guideline: the diagnosis of intensive care unit-acquired weakness in adults. *Am J Respir Crit Care Med* 2014;190:1437–46.
- Tsara V, Moisiadis N, Antoniadou M, *et al*. Characteristics and outcome of patients with difficult weaning from mechanical ventilation: an 18 years' experience of a respiratory intermediate unit attached to a pulmonary department. *Hippokratia* 2015;19:37–40.
- Sklar MC, Burns K, Rittayamai N, *et al*. Effort to breathe with various spontaneous breathing trial techniques. A physiologic meta-analysis. *Am J Respir Crit Care Med* 2017;195:1477–85.
- The Cochrane Collaboration. Review Manager (RevMan) [Computer program]. Version 5.3. Copenhagen The Nordic Cochrane Centre; 2014.
- Higgins JPT, Green S, The Cochrane Collaboration. Cochrane Handbook for systematic reviews of interventions. version 5.1.0, 2011. Available: [www.cochrane-handbook.org](http://www.cochrane-handbook.org)

## Estratégia de busca para MEDLINE

1 - exp Neuromuscular Diseases/co, di, mo, nu, pa, ph, pp, pc, rh, th [Complications, Diagnosis, Mortality, Nursing, Pathology, Physiology, Physiopathology, Prevention & Control, Rehabilitation, Therapy]

2 - Myotonic Dystrophy/ or Muscular Dystrophy, Duchenne/ or dystrophy.mp. - [46861](#)

3 - muscular dystrophy.mp. or exp Muscular Dystrophies/ - [32736](#)

4 - Myasthenia Gravis/ or myasthenia.mp. - [17216](#)

5 - congenital myasthenia.mp. or exp Myasthenic Syndromes, Congenital/ - [654](#)

6 - myopathy.mp. or \*Muscular Diseases/ - [31947](#)

7 - Myopathies, Structural, Congenital/ or congenital myopathy.mp. - [1225](#)

8 - inflammatory myopathy.mp. or \*Myositis/ - [7195](#)

9 - metabolic myopathy.mp. or Mitochondrial Myopathies/ - [1972](#)

10 - pompe disease.mp. - [1063](#)

11 - spinal muscular atrophy.mp. or exp Muscular Atrophy, Spinal/ - [6338](#)

12 - Polyradiculoneuropathy/ or exp Guillain-Barre Syndrome/ or guillian barre.mp. or Polyneuropathies/ - [13731](#)

13 - Peripheral Nervous System Diseases/ or severe inherited neuropathy.mp. - [22861](#)

14 - amyotrophic lateral sclerosis.mp. or exp Amyotrophic Lateral Sclerosis/ - [24339](#)

15 - 1 or 2 or 3 or 4 or 5 or 6 or 7 or 8 or 9 or 10 or 11 or 12 or 13 or 14 - [270807](#)

16 - Positive-Pressure Respiration/ or Respiration, Artificial/ or Ventilator Weaning/ - [65155](#)

17 - Weaning/ or weaning.mp. - [33982](#)

18 - Airway Extubation/ or spontaneous breathing trial.mp. - [1798](#)

19 - 16 or 17 or 18 - [95029](#)

20 - 15 and 19

## Estratégia de busca para EMBASE

#1 - 'neuromuscular disease' OR 'muscular dystrophy' OR myasthenia OR myopathy OR 'glycogen storage disease type 2' OR 'muscle atrophy' OR polyradiculoneuropathy OR 'peripheral neuropathy' OR 'amyotrophic lateral sclerosis' - [159,527](#)

#2 - 'artificial ventilation' OR 'ventilator weaning' OR extubation OR 'spontaneous breathing trial' - [5,215](#)

#3 - #1 AND #2 AND [2009-2020]/py



## Estratégia de busca para WEB OF SCIENCE

#1 - Todos os campos: (neuromuscular disease) OR Todos os campos: (muscular dystrophy) OR Todos os campos: (myasthenia) OR Todos os campos: (myopathy) OR Todos os campos: (glycogen storage disease type 2) OR Todos os campos: (muscle atrophy) OR Todos os campos: (polyradiculoneuropathy) OR Todos os campos: (peripheral neuropathy) OR Todos os campos: (amyotrophic lateral sclerosis) Índices=SCI-EXPANDED, SSCI, A&HCI, CPCI-S, CPCI-SSH, ESCI Tempo estipulado=2009-2020 - [100.078](#)

#2 - Todos os campos: (artificial ventilation) OR Todos os campos: (ventilator weaning) OR Todos os campos: (extubation) OR Todos os campos: (spontaneous breathing trial) Índices=SCI-EXPANDED, SSCI, A&HCI, CPCI-S, CPCI-SSH, ESCI Tempo estipulado=2009-2020 - 9.840

#3 - #1 AND #2 - Índices=SCI-EXPANDED, SSCI, A&HCI, CPCI-S, CPCI-SSH, ESCI Tempo estipulado=2009-2020

## Estratégia de busca para SCOPUS

('artificial AND ventilation' OR 'ventilator AND weaning' OR extubation OR 'spontaneous AND breathing AND trial' ) AND ( 'neuromuscular AND disease' OR 'muscular AND dystrophy' OR myasthenia OR myopathy OR 'glycogen AND storage AND disease AND type AND 2' OR 'muscle AND atrophy' OR polyradiculoneuropathy OR 'peripheral AND neuropathy' OR 'amyotrophic AND lateral AND sclerosis' ) AND ( LIMIT-TO ( PUBYEAR , 2020 ) OR LIMIT-TO ( PUBYEAR , 2019 ) OR LIMIT-TO ( PUBYEAR , 2018 ) OR LIMIT-TO ( PUBYEAR , 2017 ) OR LIMIT-TO ( PUBYEAR , 2016 ) OR LIMIT-TO ( PUBYEAR , 2015 ) OR LIMIT-TO ( PUBYEAR , 2014 ) OR LIMIT-TO ( PUBYEAR , 2013 ) OR LIMIT-TO ( PUBYEAR , 2012 ) OR LIMIT-TO ( PUBYEAR , 2011 ) OR LIMIT-TO ( PUBYEAR , 2010 ) OR LIMIT-TO ( PUBYEAR , 2009 ) )

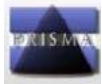

# PRISMA 2009 Checklist

| Section/topic                      | #  | Checklist item                                                                                                                                                                                                                                                                                              | Reported on page # |
|------------------------------------|----|-------------------------------------------------------------------------------------------------------------------------------------------------------------------------------------------------------------------------------------------------------------------------------------------------------------|--------------------|
| <b>TITLE</b>                       |    |                                                                                                                                                                                                                                                                                                             |                    |
| Title                              | 1  | Identify the report as a systematic review, meta-analysis, or both.                                                                                                                                                                                                                                         | 1                  |
| <b>ABSTRACT</b>                    |    |                                                                                                                                                                                                                                                                                                             |                    |
| Structured summary                 | 2  | Provide a structured summary including, as applicable: background; objectives; data sources; study eligibility criteria, participants, and interventions; study appraisal and synthesis methods; results; limitations; conclusions and implications of key findings; systematic review registration number. | 2                  |
| <b>INTRODUCTION</b>                |    |                                                                                                                                                                                                                                                                                                             |                    |
| Rationale                          | 3  | Describe the rationale for the review in the context of what is already known.                                                                                                                                                                                                                              | 2-4                |
| Objectives                         | 4  | Provide an explicit statement of questions being addressed with reference to participants, interventions, comparisons, outcomes, and study design (PICOS).                                                                                                                                                  | 4                  |
| <b>METHODS</b>                     |    |                                                                                                                                                                                                                                                                                                             |                    |
| Protocol and registration          | 5  | Indicate if a review protocol exists, if and where it can be accessed (e.g., Web address), and, if available, provide registration information including registration number.                                                                                                                               | 4                  |
| Eligibility criteria               | 6  | Specify study characteristics (e.g., PICOS, length of follow-up) and report characteristics (e.g., years considered, language, publication status) used as criteria for eligibility, giving rationale.                                                                                                      | 4-6                |
| Information sources                | 7  | Describe all information sources (e.g., databases with dates of coverage, contact with study authors to identify additional studies) in the search and date last searched.                                                                                                                                  | 6                  |
| Search                             | 8  | Present full electronic search strategy for at least one database, including any limits used, such that it could be repeated.                                                                                                                                                                               | Sup.2              |
| Study selection                    | 9  | State the process for selecting studies (i.e., screening, eligibility, included in systematic review, and, if applicable, included in the meta-analysis).                                                                                                                                                   | 6-7                |
| Data collection process            | 10 | Describe method of data extraction from reports (e.g., piloted forms, independently, in duplicate) and any processes for obtaining and confirming data from investigators.                                                                                                                                  | 6-7                |
| Data items                         | 11 | List and define all variables for which data were sought (e.g., PICOS, funding sources) and any assumptions and simplifications made.                                                                                                                                                                       | N/A                |
| Risk of bias in individual studies | 12 | Describe methods used for assessing risk of bias of individual studies (including specification of whether this was done at the study or outcome level), and how this information is to be used in any data synthesis.                                                                                      | N/A                |
| Summary measures                   | 13 | State the principal summary measures (e.g., risk ratio, difference in means).                                                                                                                                                                                                                               | N/A                |
| Synthesis of results               | 14 | Describe the methods of handling data and combining results of studies, if done, including measures of consistency (e.g., $I^2$ ) for each meta-analysis.                                                                                                                                                   | N/A                |

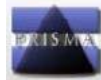

# PRISMA 2009 Checklist

| Section/topic                 | #  | Checklist item                                                                                                                                                                                           | Reported on page # |
|-------------------------------|----|----------------------------------------------------------------------------------------------------------------------------------------------------------------------------------------------------------|--------------------|
| Risk of bias across studies   | 15 | Specify any assessment of risk of bias that may affect the cumulative evidence (e.g., publication bias, selective reporting within studies).                                                             | N/A                |
| Additional analyses           | 16 | Describe methods of additional analyses (e.g., sensitivity or subgroup analyses, meta-regression), if done, indicating which were pre-specified.                                                         | N/A                |
| <b>RESULTS</b>                |    |                                                                                                                                                                                                          |                    |
| Study selection               | 17 | Give numbers of studies screened, assessed for eligibility, and included in the review, with reasons for exclusions at each stage, ideally with a flow diagram.                                          | 10                 |
| Study characteristics         | 18 | For each study, present characteristics for which data were extracted (e.g., study size, PICOS, follow-up period) and provide the citations.                                                             | N/A                |
| Risk of bias within studies   | 19 | Present data on risk of bias of each study and, if available, any outcome level assessment (see item 12).                                                                                                | N/A                |
| Results of individual studies | 20 | For all outcomes considered (benefits or harms), present, for each study: (a) simple summary data for each intervention group (b) effect estimates and confidence intervals, ideally with a forest plot. | N/A                |
| Synthesis of results          | 21 | Present results of each meta-analysis done, including confidence intervals and measures of consistency.                                                                                                  | N/A                |
| Risk of bias across studies   | 22 | Present results of any assessment of risk of bias across studies (see Item 15).                                                                                                                          | N/A                |
| Additional analysis           | 23 | Give results of additional analyses, if done (e.g., sensitivity or subgroup analyses, meta-regression [see Item 16]).                                                                                    | N/A                |
| <b>DISCUSSION</b>             |    |                                                                                                                                                                                                          |                    |
| Summary of evidence           | 24 | Summarize the main findings including the strength of evidence for each main outcome; consider their relevance to key groups (e.g., healthcare providers, users, and policy makers).                     | 10-12              |
| Limitations                   | 25 | Discuss limitations at study and outcome level (e.g., risk of bias), and at review-level (e.g., incomplete retrieval of identified research, reporting bias).                                            | 12                 |
| Conclusions                   | 26 | Provide a general interpretation of the results in the context of other evidence, and implications for future research.                                                                                  | 13                 |
| <b>FUNDING</b>                |    |                                                                                                                                                                                                          |                    |
| Funding                       | 27 | Describe sources of funding for the systematic review and other support (e.g., supply of data); role of funders for the systematic review.                                                               | 12                 |

From: Moher D, Liberati A, Tetzlaff J, Altman DG, The PRISMA Group (2009). Preferred Reporting Items for Systematic Reviews and Meta-Analyses: The PRISMA Statement. PLoS Med 6(7): e1000097. doi:10.1371/journal.pmed1000097

For more information, visit: [www.prisma-statement.org](http://www.prisma-statement.org).

# BMJ Open

## Weaning from mechanical ventilation in people with neuromuscular disease: a systematic review

|                                 |                                                                                                                                                                                                                                                                                                                                                                                                                                                                                                                                                                                                                                                                                                                                                                                                                                                                                                                                                                                                                                                                                                                                                                                                                                                                                                                                                                 |
|---------------------------------|-----------------------------------------------------------------------------------------------------------------------------------------------------------------------------------------------------------------------------------------------------------------------------------------------------------------------------------------------------------------------------------------------------------------------------------------------------------------------------------------------------------------------------------------------------------------------------------------------------------------------------------------------------------------------------------------------------------------------------------------------------------------------------------------------------------------------------------------------------------------------------------------------------------------------------------------------------------------------------------------------------------------------------------------------------------------------------------------------------------------------------------------------------------------------------------------------------------------------------------------------------------------------------------------------------------------------------------------------------------------|
| Journal:                        | <i>BMJ Open</i>                                                                                                                                                                                                                                                                                                                                                                                                                                                                                                                                                                                                                                                                                                                                                                                                                                                                                                                                                                                                                                                                                                                                                                                                                                                                                                                                                 |
| Manuscript ID                   | bmjopen-2020-047449.R1                                                                                                                                                                                                                                                                                                                                                                                                                                                                                                                                                                                                                                                                                                                                                                                                                                                                                                                                                                                                                                                                                                                                                                                                                                                                                                                                          |
| Article Type:                   | Original research                                                                                                                                                                                                                                                                                                                                                                                                                                                                                                                                                                                                                                                                                                                                                                                                                                                                                                                                                                                                                                                                                                                                                                                                                                                                                                                                               |
| Date Submitted by the Author:   | 13-Mar-2021                                                                                                                                                                                                                                                                                                                                                                                                                                                                                                                                                                                                                                                                                                                                                                                                                                                                                                                                                                                                                                                                                                                                                                                                                                                                                                                                                     |
| Complete List of Authors:       | <p>Bernardes Neto, Saint Clair; Universidade Federal do Rio Grande do Norte, PneumoCardioVascular Lab/HUOL, Hospital Universitário Onofre Lopes, Empresa Brasileira de Serviços Hospitalares and Departamento de Fisioterapia</p> <p>Torres-Castro, Rodrigo; University of Chile, Department of Physical Therapy, Faculty of Medicine; International Physiotherapy Research Network (PhysioEvidence), International Physiotherapy Research Network (PhysioEvidence)</p> <p>Lima, Íllia; Federal University of Rio Grande do Norte, FACISA - Faculdade de Ciências de Saúde do Trairi</p> <p>Resqueti, Vanessa; Federal University of Rio Grande do Norte, PneumoCardioVascular Lab/HUOL, Hospital Universitário Onofre Lopes, Empresa Brasileira de Serviços Hospitalares and Departamento de Fisioterapia; International Physiotherapy Research Network (PhysioEvidence), International Physiotherapy Research Network (PhysioEvidence)</p> <p>Fregonezi, Guilherme; Federal University of Rio Grande do Norte, 1PneumoCardioVascular Lab/HUOL, Hospital Universitário Onofre Lopes, Empresa Brasileira de Serviços Hospitalares and Departamento de Fisioterapia Universidade Federal do Rio Grande do Norte, Natal, Brazil; International Physiotherapy Research Network (PhysioEvidence), International Physiotherapy Research Network (PhysioEvidence)</p> |
| <b>Primary Subject Heading</b>: | Neurology                                                                                                                                                                                                                                                                                                                                                                                                                                                                                                                                                                                                                                                                                                                                                                                                                                                                                                                                                                                                                                                                                                                                                                                                                                                                                                                                                       |
| Secondary Subject Heading:      | Respiratory medicine                                                                                                                                                                                                                                                                                                                                                                                                                                                                                                                                                                                                                                                                                                                                                                                                                                                                                                                                                                                                                                                                                                                                                                                                                                                                                                                                            |
| Keywords:                       | Neuromuscular disease < NEUROLOGY, RESPIRATORY MEDICINE (see Thoracic Medicine), INTENSIVE & CRITICAL CARE                                                                                                                                                                                                                                                                                                                                                                                                                                                                                                                                                                                                                                                                                                                                                                                                                                                                                                                                                                                                                                                                                                                                                                                                                                                      |
|                                 |                                                                                                                                                                                                                                                                                                                                                                                                                                                                                                                                                                                                                                                                                                                                                                                                                                                                                                                                                                                                                                                                                                                                                                                                                                                                                                                                                                 |

SCHOLARONE™  
Manuscripts



I, the Submitting Author has the right to grant and does grant on behalf of all authors of the Work (as defined in the below author licence), an exclusive licence and/or a non-exclusive licence for contributions from authors who are: i) UK Crown employees; ii) where BMJ has agreed a CC-BY licence shall apply, and/or iii) in accordance with the terms applicable for US Federal Government officers or employees acting as part of their official duties; on a worldwide, perpetual, irrevocable, royalty-free basis to BMJ Publishing Group Ltd ("BMJ") its licensees and where the relevant Journal is co-owned by BMJ to the co-owners of the Journal, to publish the Work in this journal and any other BMJ products and to exploit all rights, as set out in our [licence](#).

The Submitting Author accepts and understands that any supply made under these terms is made by BMJ to the Submitting Author unless you are acting as an employee on behalf of your employer or a postgraduate student of an affiliated institution which is paying any applicable article publishing charge ("APC") for Open Access articles. Where the Submitting Author wishes to make the Work available on an Open Access basis (and intends to pay the relevant APC), the terms of reuse of such Open Access shall be governed by a Creative Commons licence – details of these licences and which [Creative Commons](#) licence will apply to this Work are set out in our licence referred to above.

Other than as permitted in any relevant BMJ Author's Self Archiving Policies, I confirm this Work has not been accepted for publication elsewhere, is not being considered for publication elsewhere and does not duplicate material already published. I confirm all authors consent to publication of this Work and authorise the granting of this licence.

## Weaning from mechanical ventilation in people with neuromuscular disease: a systematic review

Saint Clair G Bernardes Neto<sup>1</sup>, Rodrigo Torres Castro<sup>2,4</sup>, Íllia Lima<sup>3</sup>, Vanessa R Resqueti<sup>1,4</sup>, Guilherme A F Fregonezi<sup>1,4</sup>.

<sup>1</sup>PneumoCardioVascular Lab/HUOL, Hospital Universitário Onofre Lopes, Empresa Brasileira de Serviços Hospitalares and Departamento de Fisioterapia Universidade Federal do Rio Grande do Norte, Natal, Brazil

<sup>2</sup>Department of Physical Therapy, Faculty of Medicine, University of Chile, Santiago, Chile

<sup>3</sup>FACISA - Faculdade de Ciências de Saúde do Trairi, Universidade Federal do Rio Grande do Norte, Natal, Brazil

<sup>4</sup>International Physiotherapy Research Network (PhysioEvidence)

Correspondence to Saint Clair Gomes Bernardes Neto; netosam@gmail.com

### ABSTRACT

**Objective:** This systematic review aimed in assessing the effects of different weaning protocols in people with neuromuscular disease (NMD) receiving invasive mechanical ventilation, identifying which protocol is the best and how different protocols can affect weaning outcome success, duration of weaning, intensive care unit and hospital stay and mortality. **Design:** Systematic review. **Data sources:** Electronic databases (MEDLINE, EMBASE, Web of Science and Scopus) were searched from January 2009 up to August 2020. **Eligibility criteria for selecting studies:** Randomised controlled trials (RCT) and non-randomised controlled trials that evaluated NMD patients (adults and children from 5 years old) in the weaning process managed with a protocol (pressure support ventilation; synchronized intermittent mandatory ventilation; CPAP; “T” piece). **Primary outcome:** Weaning success. **Secondary outcomes:** weaning duration; intensive care unit (ICU) stay; hospital stay; ICU mortality; complications (pneumothorax, ventilation associated pneumonia). **Data extraction and synthesis:** Two review authors assessed the titles and the

1  
2  
3 abstracts for inclusion and reviewed the full-texts independently. **Results:** We  
4 found no studies that fulfilled the inclusion criteria. **Conclusions:** The absence  
5 of studies about different weaning protocols for NMD patients does not allow  
6 concluding the superiority of any specific weaning protocol for patients with  
7 NMD or determining the impact of different types of protocols on other  
8 outcomes. The result of this review encourages further studies. **PROSPERO**  
9 **registration number:** CRD42019117393.

10  
11  
12  
13  
14  
15 **Keywords:** mechanical ventilation; ventilator weaning; neuromuscular disease

## 16 17 18 19 20 **STRENGTHS AND LIMITATIONS OF THIS STUDY**

- 21 • Studies on weaning for neuromuscular disease do not consider any  
22 specific protocol.
- 23 • Non-invasive ventilation is described as a promising resource for  
24 neuromuscular disease patients after mechanical ventilation.
- 25 • Observational and retrospective studies are the most common for  
26 neuromuscular disease patients.
- 27 • Neuromuscular individuals needs specific weaning protocols.

## 28 29 30 31 32 33 34 35 36 37 38 **INTRODUCTION**

39  
40  
41 Neuromuscular disease (NMD) can be defined as a chronic and  
42 progressive disease, which may present with different clinical characteristics, in  
43 which its pattern is based on the location where the injury occurs in a motor  
44 unit.<sup>1,2</sup> NMD are characterized by progressive muscular impairment, with  
45 difficulty in ambulation, swallowing and ventilation, with progressive reduction of  
46 vital capacity and increased work of breathing.<sup>3</sup> These changes lead to the  
47 development of acute and chronic respiratory failure, which is an important  
48 cause of prolonged ventilatory dependence<sup>4,5</sup>, associated with increased  
49 healthcare costs.<sup>6</sup>

50  
51  
52  
53  
54  
55  
56  
57 Three main components may contribute to respiratory failure and the  
58 need for mechanical ventilation in these patients: (1) inspiratory muscle  
59  
60

1  
2  
3 weakness; (2) expiratory muscle weakness; (3) upper airway compromise.<sup>7-9</sup>  
4  
5 The NMD patients experience this respiratory impairment, in general, by a large  
6  
7 proportion of motor units that innervate the respiratory muscles affected.<sup>2</sup>  
8

9  
10 The majority of critically ill patients admitted to ICU require ventilatory  
11 support for acute or chronic respiratory failure,<sup>3</sup> specially the NMD ones.<sup>8,10-12</sup> In  
12 addition, the pattern of neuromuscular abnormalities associated with critical  
13 illness, defined as ICU-acquired weakness (ICUAW), can lead to prolonged  
14 mechanical ventilation, a longer hospital stay and increased ventilation.<sup>4</sup>  
15  
16

17  
18 The emergence of respiratory symptoms, with progressive hypercapnia,  
19 can lead to death from respiratory failure.<sup>3,7</sup> Long-term invasive or non-invasive  
20 mechanical ventilation is the main intervention for people who present with  
21 acute respiratory acidosis; progressive decline in vital capacity (<10–15 mL/kg);  
22 or progressive decline in maximal inspiratory pressure (<20–30 cmH<sub>2</sub>O).<sup>3,8,13</sup>  
23  
24  
25

26  
27 Weaning from mechanical ventilation is the process of transition to  
28 spontaneous ventilation.<sup>14</sup> In people with NMD, conventional weaning is  
29 generally not possible.<sup>15</sup> Weaning difficulty may occur in different populations,  
30 such as older people with prolonged ICU hospitalization, people with chronic  
31 respiratory diseases or NMD.<sup>16</sup> Therefore, the decision to progress to  
32 extubation is more challenging in this group of people with advanced respiratory  
33 muscle weakness, and this can lead to a need for tracheostomy and prolonged  
34 mechanical ventilation.<sup>4</sup>  
35  
36  
37  
38  
39  
40

41 The weaning process may be conducted in different protocols such as  
42 the following:  
43

- 44  
45 • ‘T’ piece: in which the patient receives only supplemental oxygen through  
46 a T-shaped tube connected to an endotracheal tube (orotracheal or  
47 tracheostomy).<sup>14</sup>  
48  
49
- 50  
51 • Continuous positive airway pressure (CPAP): the weaning protocol  
52 involves using a continuous pressure, equal to the previous positive end-  
53 expiratory pressure level used before.<sup>14</sup>  
54  
55
- 56  
57 • Pressure support: the use of progressive lower levels of inspiratory  
58 pressure support until it reaches 5–8 cmH<sub>2</sub>O.<sup>14</sup> This protocol is the most  
59 used and described one.  
60



1  
2  
3 Successful weaning is defined as the ability to maintain spontaneous  
4 ventilation without the need for reintubation and invasive mechanical ventilation  
5 for 48 hours after extubation.<sup>14</sup> For patients with NMD, due to the difficulty of  
6 weaning, it may be also defined as the absence of a need for tracheostomy and  
7 mechanical ventilation for 5 days after extubation.<sup>4</sup>  
8  
9  
10

11  
12 Post weaning monitoring should observe whether two of the following  
13 findings are present: respiratory acidosis (pH <7.35; PaCO<sub>2</sub>>45 mmHg);  
14 SpO<sub>2</sub><90% or PaO<sub>2</sub><60 mmHg with FiO<sub>2</sub>>50%; RR >35 rpm; decreased level of  
15 consciousness, restlessness or excessive sweating; or signs suggestive of  
16 respiratory muscle fatigue, such as the use of accessory muscles or paradoxical  
17 movement of the abdomen, in order to determinate the need to re-establish  
18 mechanical ventilation again.<sup>4,14</sup>  
19  
20  
21  
22  
23

24  
25 Weaning failure from invasive ventilation is frequent in people with NMD  
26 due to muscle weakness and gradual hypercapnia.<sup>4</sup> In this way, non-invasive  
27 ventilation, even after weaning failure, is an option. Furthermore, a future  
28 weaning can be conducted when and if clinically possible.<sup>4,16</sup> Although this  
29 whole process significantly increases health costs with this patient population.  
30  
31  
32  
33  
34  
35

## 36 Objectives

37  
38 The aim of this systematic review was to assess the effects of different  
39 weaning protocols in people with NMD receiving invasive mechanical  
40 ventilation. Our secondary aim was to assess how the different protocols affect  
41 weaning success, duration of weaning, duration of stay in the ICU, duration of  
42 hospital stay, ICU mortality and also to assess adverse effects.  
43  
44  
45  
46  
47  
48  
49

## 50 METHODS

### 51 Protocol and registration

52  
53 This systematic review was registered on PROSPERO (Registration  
54 Number: CRD42019117393. The review authors followed the Cochrane  
55 Handbook for Systematic Reviews of Interventions<sup>17</sup> and the PRISMA  
56  
57  
58  
59  
60

Statement.<sup>18</sup> The protocol for the systematic review was previously published on BMJ Open.<sup>19</sup>

## Eligibility criteria for inclusion

### *Population*

Adults (above 16 years old) and children (from 5 to 16 years old) with a clinical diagnosis of a NMD (muscular dystrophy of any origin including Duchenne muscular dystrophy, amyotrophic lateral sclerosis, congenital myasthenia, myasthenia gravis, congenital myopathy, spinal muscular atrophy, Guillian Barré Syndrome, severe inherited neuropathies, metabolic myopathies (Pompe disease), inflammatory myopathies and mitochondrial diseases) of any gender.

All patients ventilated for at least 48 hours with orotracheal tube or tracheostomy because of acute respiratory failure, and considered by physicians to be ready for weaning according to clinical criteria and weaning parameters. No patients with other respiratory or cardiovascular clinical diagnosis associated were considered, nor patients with mixed NMD diagnosis.

### *Intervention*

The intervention assessed was the process of weaning from mechanical ventilation in people with NMD using a protocol with criteria for deciding if the patient is ready for extubation with 30 min to 2 hours SBT at the end point of the protocol. The following protocols were considered for inclusion:

1. Pressure support ventilation, with gradual reduction of the support pressure.
2. Synchronized intermittent mandatory ventilation, with gradual reduction of respiratory rate and support pressure.
3. CPAP, with gradual reduction of applied pressure.
4. 'T' piece, with progressive increase of spontaneous ventilation time.

## **Comparison**

Any comparison between the different protocols was considered. If the studies classified the weaning based on the outcomes: simple (successful after first attempt of spontaneous breathing trial - SBT); difficult (requiring up to three attempts or less than 7 days to reach success; prolonged (requiring more than 7 days to reach success), comparisons would also be considered.

## **Outcomes**

### **Primary outcome**

Weaning success, defined as the ability to maintain spontaneous ventilation without the need for reintubation and invasive mechanical ventilation for 48 hours after extubation.<sup>14</sup>

### **Secondary outcomes**

- Duration of weaning in patients with acute and prolonged mechanical ventilation - defined as the time between the weaning protocol initiation and the moment of extubation.
- Duration of ICU stay in patients with acute and prolonged mechanical ventilation - defined as the time between ICU admission and ICU discharge.
- Duration of hospital stay in patients with acute and prolonged mechanical ventilation - defined as the time between hospital admission and hospital discharge.
- ICU mortality rate in patients with acute and prolonged mechanical ventilation - defined as the mortality rate during ICU stay.
- Incidence of pneumothorax during mechanical ventilation period.
- Incidence of ventilation associated pneumonia.

## **Study designs**

To ensure this evidence synthesis is based upon the highest quality of evidence, we only considered including randomised controlled trials (RCTs) and non-randomised controlled trials (experimental study with participants subjected to some type of intervention or control group, and with the same outcome of interest measured). There were no restrictions to language in the studies selection.

## **Search method**

Electronic databases were searched from 1<sup>st</sup> January 2009 up to 31<sup>st</sup> August 2020: Cochrane Neuromuscular Specialised Register (The Cochrane Library, current issues), MEDLINE, EMBASE, Web of Science and Scopus. We also searched the United States National Institutes of Health Clinical Trials Registry, ClinicalTrials.gov (ClinicalTrials.gov) and the WHO International Clinical Trials Registry Portal (apps.who.int/trialsearch/).

Search terms included were: 'neuromuscular disease' or all other terms compatible with clinical diagnoses of these types of diseases, such as 'muscular dystrophy', 'Duchenne muscular dystrophy', 'amyotrophic lateral sclerosis', 'congenital myasthenia', 'myasthenia gravis', 'congenital myopathy', 'spinal muscular atrophy', 'Guillain Barré Syndrome', 'severe inherited neuropathies', 'metabolic myopathies', 'Pompe disease', 'inflammatory myopathies' and 'mitochondrial diseases' combined with 'mechanical ventilation' or 'artificial respiration' or 'mechanical ventilation weaning' or 'ventilator weaning' or 'respirator weaning' and all the combination between them. The search strategy is available as an online supplementary file.

## **Study selection**

Two review authors (SCBN and IL) performed the search. Two review authors (SCBN and RTC) assessed the titles and the abstracts for inclusion independently and induplicate. When the full text was assessed for eligibility criteria it was performed independently as well, and the authors had an

1  
2  
3 excellent agreement of 99.5%. The disagreements were resolved through  
4 consultation of a third review author (IL).  
5  
6  
7  
8

## 9 **Patient and Public Involvement**

10  
11 In the present systematic review there was no involvement of patients or  
12 public. The paper proposed to use results previously authorised and published  
13 by other authors, without there being any need for patient or public involvement.  
14  
15 The research question was developed based on the questions raised by other  
16 authors, most of the time according to the clinical difficult and necessity of  
17 improving the weaning protocols for this population. The results presented are  
18 available in the publication for NMD patients and public in general.  
19  
20  
21  
22  
23  
24  
25

## 26 **RESULTS**

27  
28 After searching scrutinously all the databases proposed from January  
29 2009 to August 2020 no studies fulfilled the inclusion criteria regarding different  
30 weaning protocols on neuromuscular disease patients receiving mechanical  
31 ventilation for respiratory failure. A flowchart shows the detailed process of  
32 selection (Fig1).  
33  
34  
35  
36  
37

### 38 **Fig1. Flowchart showing publication selection.<sup>18</sup>**

39  
40 Although 24 studies were selected to full-text reading, 3 letters to the  
41 editor<sup>20-22</sup> and 2 narrative reviews<sup>23,24</sup> were identified. In addition, 11 studies  
42 presented retrospective analysis, 7 of which were of general population<sup>12,16,25-29</sup>  
43 and 4 with NMD patients.<sup>4,30-32</sup> All the retrospective evaluated and described  
44 weaning outcomes. Prospective analysis as observational study, but without a  
45 control group, was found in 6 studies<sup>33-38</sup> and in 2 it was described 2 groups in  
46 their observations evaluating prognostic factors related to MV weaning  
47 outcomes<sup>35</sup> or the impact of a chest physiotherapy protocol on the prevention of  
48 post-extubation atelectasis in NMD population.<sup>38</sup> With this, only 2 studies met  
49 the criteria for non-randomised study profile, having a group of group.<sup>39,40</sup>  
50  
51 These two articles are presented in the Discussion section below.  
52  
53  
54  
55  
56  
57  
58  
59  
60

## DISCUSSION

We found no high quality evidence either for or against any of the weaning protocols proposed (PSV, SIMV, CPAP or 'T' piece) in MND patients under mechanical ventilation.

The decision about the ideal time to extubate these patients and wean them from ventilatory support is much harder for the patients that deal with respiratory muscle weakness and chronic ventilatory failure, increasing repeated extubation fails and tracheotomies rates.<sup>4</sup>

In the retrospective studies group with NMD patients it was described that early extubation (< 6 hours) after a thymectomy in myasthenia gravis crisis was related to a lower reintubation rate, lower postoperative pulmonary infection and shorter duration of ICU stay compared to late extubation (> 6 hours).<sup>30</sup> Another interesting factor associated with prolonged mechanical ventilation and tracheostomy prolonged need in these patients is neurogenic dysphagia.<sup>31</sup> And non-invasive ventilation was highlighted as a feasible intervention to be used after weaning failure with survival improvement and lower reintubation rate<sup>4</sup>, as well as instead of invasive mechanical ventilation and future weaning, where no mortality difference was noted.<sup>32</sup>

The observational prospective studies without control group showed that non-invasive ventilation initiated after spontaneous breathing cycles for Guillain-Barré Syndrom patients under MV is a potential therapeutic strategy.<sup>34</sup> And the study that observed the comparison between different 5 weaning predictors described that the Timed Inspiratory Effort index had a better performance than the others (integrative weaning index, non-invasive tension-time index, maximum inspiratory pressure, and breathing frequency/tidal volume – RSBI).<sup>36</sup>

Two prospective studies with different groups, that were not included because did not because they did not evaluate weaning protocols, attempted to compare prognostic factors of weaning in patients with ALS<sup>35</sup> and the ability to prevent atelectasis after extubation with respiratory physiotherapy.<sup>38</sup> In the first, it was observed that tracheostomy and use of MV was associated with longer survival, compared to patients who were not directly submitted to invasive MV. The worst prognosis was related to older patients and to the time of respiratory

1  
2  
3 symptoms onset.<sup>35</sup> The other study demonstrated, with randomised groups, that  
4 a post-extubation chest physiotherapy protocol decreased the incidence of  
5 atelectasis in paediatric NMD patients.<sup>38</sup>  
6  
7

8  
9 Sun et al.<sup>40</sup> investigated patients with myasthenia gravis crisis who were  
10 hospitalized and needed invasive mechanical ventilation. All the patients were  
11 submitted to ventilatory weaning with a gradual reduction in support pressure as  
12 protocol, up to values that allowed the spontaneous breathing trial in this  
13 ventilatory mode. In addition to the SBT, the analysis of the Rapid and Shallow  
14 Breathing Index (RSBI) and the fraction of diaphragm thickening fraction (DTF)  
15 by bedside ultrasound were also performed. The patients were divided into a  
16 successful weaning group and a weaning failure group. Of the 37 patients  
17 evaluated, with 63 evaluation measures taken, the characteristics of the groups  
18 were similar at the beginning of the SBT. Between 50 and 60 minutes from the  
19 beginning of the SBT, the authors reported that there was a statistically  
20 significant increase in the RSBI compared to the initial 5 minutes (80.41 x 57.29  
21 - p = 0.029), as well as a reduction in the DTF (24.46 x 61.89 - p = 0.000) in the  
22 weaning failure group (n = 30). These variables were not observed in the  
23 successful weaning group (n = 33).  
24  
25  
26  
27  
28  
29  
30  
31  
32  
33  
34

35 The findings of this study allow us to deduce that the weaning protocol  
36 using pressure support, as well as the analysis of the RSBI and/or the DTF  
37 during spontaneous breathing trial, can be a predictive value for the success or  
38 failure of weaning.<sup>40</sup>  
39  
40  
41

42 Vianello et al.<sup>39</sup>, on the other hand, studied patients diagnosed with NMD  
43 and who were admitted to ICUs requiring ventilatory support. In their inclusion  
44 criteria there were patients who remained on MV for > 48 hours and who  
45 underwent a weaning protocol with a gradual reduction in support pressure. The  
46 authors compare the use of NIV immediately after extubation associated with  
47 mechanically assisted cough versus a control group of patients with NMD who  
48 received standard medical therapy, without the interventions mentioned, after  
49 extubation. All patients underwent an SBT in PSV mode with PS < 8 cmH<sub>2</sub>O  
50 and were considered able to be extubated when they showed no signs of  
51 intolerance.  
52  
53  
54  
55  
56  
57  
58  
59  
60



1  
2  
3 The results described demonstrate, despite the absence of difference in  
4 the mortality outcome, that the need for reintubation (30% x 100% -  $p = 0.002$ )  
5 and tracheostomy (30% x 90% -  $p = 0.01$ ) was significantly greater in the group  
6 that received standard medical therapy, although all patients were considered  
7 ready for extubation by the protocol using the ventilatory pressure support  
8 mode.<sup>39</sup>  
9

10  
11  
12  
13  
14 According to the other studies observed during the search, weaning has  
15 been studied and applied to this population in the aforementioned types of  
16 protocols. But the results are not satisfactory for any of them, with high failure  
17 rates in the process anyway.  
18  
19

20  
21 The search for the best way to promote weaning from mechanical  
22 ventilation for the population of patients with NMD has led professionals and  
23 researchers to focus on the use of NIV as a way of progressing and continuing  
24 weaning from MV.<sup>4,34,39</sup> This type of approach is justified by the absence of  
25 studies with an appropriate methodology that identify a better way to conduct  
26 weaning in these patients. The combination of NIV with invasive MV has led to  
27 a reduction in reintubation rates, despite the increase in the number of patients  
28 dependent on this therapy.<sup>4,39,41</sup> This observation was also described even for  
29 prolonged MV patients with NMD.<sup>34</sup>  
30  
31  
32  
33  
34  
35  
36

37 Although NIV has been described as an excellent alternative for weaning  
38 in patients who fail in the conventional conditions for evaluating weaning<sup>23</sup>  
39 (protocols proposed for analysis) it seems to be more efficient when installed  
40 immediately after MV removal and not after the appearance respiratory failure,  
41 when it would be, especially for patients with NMD, associated with a greater  
42 probability of failure and the need to return to invasive MV.<sup>4</sup>  
43  
44  
45  
46  
47

48 Xu et al.<sup>37</sup> observed, in a series of cases of infantile and juvenile patients  
49 with Pompe disease, that after conducting weaning in CPAP or PSV, the use of  
50 NIV immediately after extubation led to an improvement in respiratory muscle  
51 strength, with better respiratory conditions after extubation. However, the result  
52 reported by the authors reinforces that the conventional assessment on  
53 weaning does not seem to be sufficient for patients with NMD.  
54  
55  
56  
57  
58  
59  
60



1  
2  
3 Another important consideration is that respiratory failure in patients with  
4 NMD is not only due to impaired respiratory muscle strength, but also due to  
5 bulbar dysfunction. Traditional methods of assessing the progression of  
6 weaning and extubation have important limitations in determining these  
7 changes. Craig et al. even conditioned the removal of MV and placement in NIV  
8 for progression of the weaning to conventional parameters of spontaneous  
9 breathing conditions and also to safe bulbar function.<sup>34</sup>

10  
11  
12  
13  
14  
15  
16 Lack of evidence of effectiveness, like in this case, is not evidence that  
17 the interventions are ineffective, simply means that there were no papers that  
18 met the criteria of methodological quality to be evaluated.  
19  
20  
21  
22

### 23 **Implications for practice**

24  
25 We found no relevant evidence, so we cannot make any  
26 recommendations about better weaning protocols for neuromuscular disease  
27 patients. The guidelines about ventilatory support management for NMD  
28 patients should be more explicit and clear about the basis of the  
29 recommendations regarding weaning protocols.  
30  
31  
32  
33  
34  
35  
36

### 37 **Implications for research**

38  
39 Given the high incidence of NMD patients requiring mechanical  
40 ventilation for acute or chronic respiratory failure<sup>10,11</sup> there is a lot of space for  
41 randomised controlled trials, with high methodological rigor to better define the  
42 best weaning protocol in this population to ensure better outcomes, mainly in  
43 the weaning success.  
44  
45  
46  
47  
48  
49

### 50 **CONCLUSION**

51  
52 The absence of studies presenting the proposed inclusion criteria does  
53 not allow concluding the superiority of any specific weaning protocol for patients  
54 with NMD or determining the impact of different types of protocols on other  
55 outcomes such as duration of mechanical ventilation and weaning, duration of  
56 ICU or hospital stay, mortality or complications.  
57  
58  
59  
60

1  
2  
3 The result of this review encourages other authors and researchers to  
4 develop specific research and with an adequate methodology in order to seek  
5 better answers on weaning protocols in this population.  
6  
7  
8  
9

## 10 **ACKNOWLEDGEMENTS**

11  
12  
13 The authors thank the anonymous reviewers that contributed  
14 constructively to the manuscript.  
15  
16

17 We would also like to thank the members of PneumoCardioVascular  
18 Lab/HUOL and Laboratório de Inovação Tecnológica em Reabilitação from  
19 Universidade de Federal do Rio Grande do Norte in Brazil for their contribution  
20 in researches with neuromuscular disease patients.  
21  
22  
23  
24  
25

## 26 **CONFLICTS OF INTERESTS**

27  
28  
29 The authors have declared that no competing interests exist.  
30

31 No additional data available.  
32  
33  
34  
35

## 36 **AUTHOR STATEMENT**

37 Data curation: SCBN; RTC.

38 Formal analysis: SCBN; RTC.

39 Methodology: SCBN; RTC; IL.

40 Resources: VRR; GAFF.

41 Writing - original draft: SCBN; RTC; GAFF.

42 Writing – review & editing: SCBN; RTC; IL; VRR; GAFF.

43 No additional data available.  
44  
45  
46  
47  
48  
49  
50  
51  
52  
53  
54  
55

## 56 **FUNDING**

57 The study received financial support from the Coordenação de  
58 Aperfeiçoamento de Pessoal de Nível Superior (CAPES)  
59  
60

(<https://www.gov.br/cases/pt-br>), PGCI CAPES 054/2014 - 23038.007514/2014-78. GAFF received a grant from CNPq (<https://www.cnpq.br>) number 312876/2018-1, and VRR received a grant from CNPq (<https://www.cnpq.br>) number 315580/2018-6. The funders had no role in study design, data collection and analysis, decision to publish, or preparation of the manuscript.

No additional data available.

## DATA SHARING STATEMENT

No additional data available.

## REFERENCES

1. Anziska Y, Sternberg A. Exercise in neuromuscular disease. *Muscle Nerve*. 2013;48:3–20.
2. Rezania K, Goldenberg FD, White S. Neuromuscular disorders and acute respiratory failure: diagnosis and management. *Neurol Clin*. 2012;30:161–85.
3. Ambrosino N, Carpenè N, Gherardi M. Chronic respiratory care for neuromuscular diseases in adults. *Eur Respir J*. 2009;34:444–51.
4. Kim SM, Kang SW, Choi YC, Park YG, Won YH. Successful extubation after weaning failure by noninvasive ventilation in patients with neuromuscular disease: case series. *Ann Rehabil Med*. 2017;41:450–5.
5. Cabrera Serrano M, and Rabinstein AA. Causes and outcomes of acute neuromuscular respiratory failure. *Archives of neurology*. 2010;67:1089-1094.
6. Busl KM, Ouyang B, Boland TA, Pollandt S, Temes RE. Prolonged mechanical ventilation is associated with pulmonary complications, increased length of stay, and unfavorable discharge destination among patients with subdural hematoma. *J Neurosurg Anesthesiol*. 2015;27:31–6.

- 1  
2  
3 7. Benditt JO, and Boitano LJ. Pulmonary issues in patients with chronic  
4 neuromuscular disease. *American journal of respiratory and critical care*  
5 *medicine*. 2013;187:1046-1055.  
6  
7
- 8  
9 8. Racca F, Vianello A, Mongini T, Ruggeri P, Versaci A, Vita GL, and Vita G.  
10 Practical approach to respiratory emergencies in neurological diseases.  
11 *2020;41:497-508*.  
12  
13
- 14 9. Vassilakopoulos T, Petrof BJ. Ventilator-Induced diaphragmatic dysfunction.  
15 *Am J Respir Crit Care Med*. 2004;169:336–41.  
16  
17
- 18 10. Luo F, Annane D, Orlikowski D, He L, Yang M, Zhou M, and Liu GJ.  
19 Invasive versus non-invasive ventilation for acute respiratory failure in  
20 neuromuscular disease and chest wall disorders. *The Cochrane database*  
21 *of systematic reviews*. 2017;12:CD008380.  
22  
23  
24  
25
- 26 11. Schoser B, Fong E, Geberhiwot T, Hughes D, Kissel JT, Madathil SC,  
27 Orlikowski D, Polkey MI, Roberts M, Tiddens HA, and Young P. Maximum  
28 inspiratory pressure as a clinically meaningful trial endpoint for  
29 neuromuscular diseases: a comprehensive review of the literature.  
30 *Orphanet Journal of Rare Diseases*. 2017;12:52.  
31  
32  
33
- 34 12. Windisch W, Dellweg D, Geiseler J, et al. Prolonged weaning from  
35 mechanical ventilation: results from specialized weaning centers - a  
36 registry-based study from the WeanNet Initiative. *Dtsch Arztebl Int*.  
37 *2020;117:197–204*.  
38  
39  
40  
41
- 42 13. Chevrolet JC, Deléamont P. Repeated vital capacity measurements as  
43 predictive parameters for mechanical ventilation need and weaning success  
44 in the Guillain-Barré syndrome. *Am Rev Respir Dis*. 1991;144:814–8.  
45  
46  
47
- 48 14. Zein H, Baratloo A, Negida A, et al. Ventilator weaning and spontaneous  
49 breathing trials; an educational review. *Emerg*. 2016;4:65–71.  
50  
51
- 52 15. Fan E, Cheek F, Chlan L, et al. An official American thoracic Society clinical  
53 practice guideline: the diagnosis of intensive care unit-acquired weakness in  
54 adults. *Am J Respir Crit Care Med*. 2014;190:1437–46.  
55  
56
- 57 16. Tsara V, Moisiadis N, Antoniadou M, et al. Characteristics and outcome of  
58 patients with difficult weaning from mechanical ventilation: an 18 years'  
59  
60

- 1  
2  
3 experience of a respiratory intermediate unit attached to a pulmonary  
4 department. *Hippokratia*. 2015;19:37–40.  
5  
6  
7 17. Higgins JPT, Green S, The Cochrane Collaboration. *Cochrane Handbook*  
8 for systematic reviews of interventions. version 5.1.0, 2011. Available:  
9 [www. cochrane- handbook. Org](http://www.cochrane-handbook.org)  
10  
11  
12  
13 18. Moher D, Liberati A , Tetzlaff J, Altman DG, Group P. Preferred reporting  
14 items for systematic reviews and meta-analyses: the PRISMA statement. *J*  
15 *Clin Epidemiol*. 2009;62(10):1006–12.  
16  
17  
18 19. Bernardes Neto SCG, Torres R, Lima Í, et al. Weaning from mechanical  
19 ventilation in people with neuromuscular disease: protocol for a systematic  
20 review. *BMJ Open*. 2019.  
21  
22  
23  
24 20. Racca F, Del Sorbo L, Capello EC, Ranieri VM. Neuromuscular patients as  
25 candidates for non-invasive ventilation during the weaning process. *Minerva*  
26 *anestesiologica*. 2012;78(3): 391.  
27  
28  
29  
30 21. Vianello A, Arcaro G, Braccioni F. Preventive non-invasive ventilation is  
31 indicated for neuromuscular disease patients after extubation. *Minerva*  
32 *Anesthesiol*. 2012,78(3):390.  
33  
34  
35  
36 22. Cheng G, Bach JR. Continuous critical care and long-term noninvasive  
37 ventilatory support for patients with neuromuscular disease. *Chest*.  
38 2009;135(1):246-247.  
39  
40  
41  
42 23. Gonzalez-Bermejo J, Morelot-Panzini C, Similowski T, Demoule A.  
43 Particularités du sevrage de la ventilation mécanique chez les patients  
44 atteints de maladie neuromusculaire - Weaning of mechanical ventilation in  
45 neuromuscular diseases. *Réanimation*. 2009;18(7):576-581.  
46  
47  
48  
49 24. Pohl M. Weaning from prolonged mechanical ventilation in early  
50 neurological and neurosurgical rehabilitation (ENNR).  
51 *Beatmungsentwöhnung in der neurologisch-neurochirurgischen*  
52 *Frührehabilitation*. 2016;22(3):187-191.  
53  
54  
55  
56 25. Pnfick M, Wiederer R, Bosl K, et al. The influence of weaning duration on  
57 rehabilitative outcome in early neurological rehabilitation.  
58 *NeuroRehabilitation*. 2014;34(3):493-498.  
59  
60

- 1  
2  
3 26. Bach JR, Sinqee DM, Saporito LR, Botticello AM. Efficacy of mechanical  
4 insufflation-exsufflation in extubating unweanable subjects with restrictive  
5 pulmonary disorders. *Respiratory care*. 2015;60(4):477-483.  
6  
7
- 8  
9 27. Liptzin DR, Connell EA, Marable J, et al. Ready or not? weaning chronic  
10 ventilation and decannulation in a pediatric ventilator care program. *Am. J.*  
11 *Respir. Crit. Care Med*. 2015;191.  
12  
13
- 14 28. Parker R, Sunderland G, Ford V, et al. Initiation of long-term non-invasive  
15 ventilation enables successful weaning from prolonged mechanical  
16 ventilation. *Thorax*. 2013;68:A45-46.  
17  
18
- 19 29. Feng XW, Zhou XM, Qu WX, et al. Retrospective analysis of related factors  
20 for patients with weaning difficulties in medical intensive care unit. *Nat.*  
21 *Med. J. China*. 2011;91(38):2688-2691.  
22  
23
- 24 30. Chen L, Xie W, Zheng D, et al. *Neurological sciences*. 2019;40(10):2125-  
25 2132.  
26  
27
- 28 31. Schroder JB, Marian T, Muhle P, et al. Intubation, tracheostomy, and  
29 decannulation in patients with Guillain-Barre-syndrome-does dysphagia  
30 matter? *Muscle & Nerve*. 2019;59(2):194-200.  
31  
32
- 33 32. Chadwick R, Nadig V, Oscroft NS, Shneerson JM, Smith IE. Weaning from  
34 prolonged invasive ventilation in motor neuron disease: analysis of  
35 outcomes and survival. *Journal of neurology, neurosurgery, and psychiatry*.  
36 2011;82(6):643-645.  
37  
38
- 39 33. Onders RP, Khansarinia S, Weiser T, et al. Multicenter analysis of  
40 diaphragm pacing in tetraplegics with cardiac pacemakers: positive  
41 implications for ventilator weaning in intensive care units.  
42 *Surgery*. 148(4):893-898.  
43  
44
- 45 34. Craig VJ, Ford V, Chakrabarti B, et al. Non-invasive ventilation in the  
46 weaning of patients with acute guillain barre syndrome requiring invasive  
47 ventilation. *Am. J. Respir. Crit. Care Med*. 2017;195.  
48  
49
- 50 35. Hayashi N, Atsuta N, Yokoi D, et al. Prognosis of amyotrophic lateral  
51 sclerosis patients undergoing tracheostomy invasive ventilation therapy in  
52  
53  
54  
55  
56  
57  
58  
59  
60



1  
2  
3 Japan. Journal of neurology, neurosurgery, and psychiatry. 2020;91(3):285-  
4 290.

5  
6  
7 36.de Souza LC, Guimaraes FS,Lugon JR. The timed inspiratory effort: a  
8 promising index of mechanical ventilation weaning for patients with  
9 neurologic or neuromuscular diseases. Respiratory care. 2015;60(2):231-  
10 218.

11  
12  
13  
14 37.Xu L, Ba H, Pei Y, et al. Comprehensive approach to weaning in difficult-to-  
15 wean infantile and juvenile-onset glycogen-storage disease type II patients:  
16 A case series. Ital. J. Pediatr. 2019;45(1).

17  
18  
19 38.Bilan N, Poorshiri B. The role of chest physiotherapy in prevention of  
20 postextubation atelectasis in pediatric patients with neuromuscular  
21 diseases. Iran J. Child Neurol. 2013;7(1):21-24.

22  
23  
24 39.Vianello A, Arcaro G, Braccioni F, et al. Prevention of extubation failure in  
25 high-risk patients with neuromuscular disease. Journal of critical care.  
26 2011;26(5):517-524.

27  
28  
29 40.Sun Q, Shan F, Dong H, et al. Predictive value of ultrasonic diaphragm  
30 thickening fraction on successful weaning for patients with myasthenia  
31 gravis crisis. Zhonghua wei zhong bing ji jiu yi xue. 2017;29(7):619-623.

32  
33  
34 41.Bach JR, Goncalves MR, Hamdani I, Winck JC. Extubation of patients with  
35 neuromuscular weakness: a new management paradigm. Chest.  
36 2010;137:1033-9.

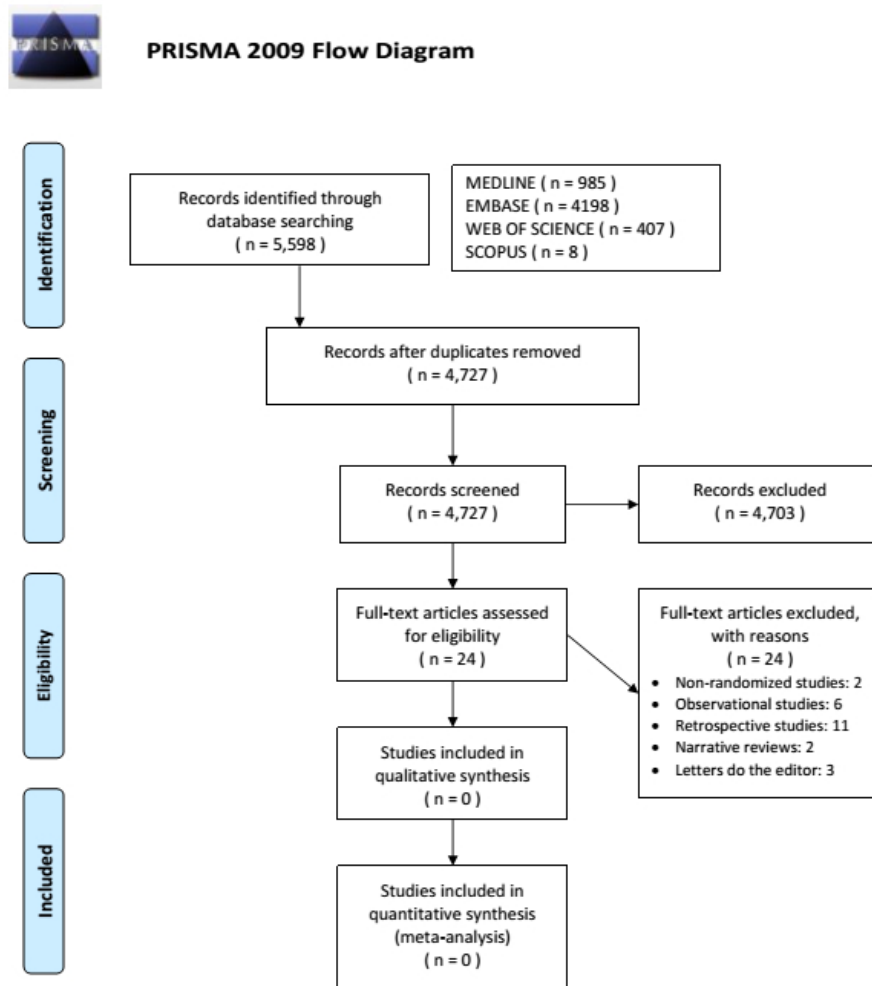

From: Moher D, Liberati A, Tetzlaff J, Altman DG, The PRISMA Group (2009). Preferred Reporting Items for Systematic Reviews and Meta-Analyses: The PRISMA Statement. PLoS Med 6(7): e1000097. doi:10.1371/journal.pmed1000097

For more information, visit [www.prisma-statement.org](http://www.prisma-statement.org).

Fig1. Flowchart showing publication selection.

# BMJ Open Weaning from mechanical ventilation in people with neuromuscular disease: protocol for a systematic review

Saint Clair Gomes Bernardes Neto <sup>1</sup>, Rodrigo Torres,<sup>2</sup> Íllia Lima,<sup>3</sup>  
Vanessa R Resqueti,<sup>3</sup> Guilherme A F Fregonezi<sup>3</sup>

**To cite:** Bernardes Neto SCG, Torres R, Lima Í, *et al*. Weaning from mechanical ventilation in people with neuromuscular disease: protocol for a systematic review. *BMJ Open* 2019;0:e029890. doi:10.1136/bmjopen-2019-029890

► Prepublication history and additional material for this paper are available online. To view these files, please visit the journal online (<http://dx.doi.org/10.1136/bmjopen-2019-029890>).

Received 12 March 2019  
Revised 09 September 2019  
Accepted 17 September 2019

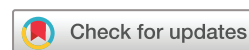

© Author(s) (or their employer(s)) 2019. Re-use permitted under CC BY-NC. No commercial re-use. See rights and permissions. Published by BMJ.

<sup>1</sup>RENORBIO – Biotechnology, Universidade Federal do Rio Grande do Norte, Natal, Brazil  
<sup>2</sup>Physiotherapy, University of Chile, Santiago, Chile  
<sup>3</sup>Department of Physical Therapy, Federal University of Rio Grande do Norte, Natal, Brazil

## Correspondence to

Saint Clair Gomes Bernardes Neto; netosam@gmail.com

## ABSTRACT

**Introduction** Neuromuscular diseases (NMD) are characterised by progressive muscular impairment. The muscle weakness is directly related to respiratory muscles weakness, causing reduction in vital capacity, especially when associated with mechanical ventilation (MV). Conventional MV weaning in NMD is generally difficult. Weaning process can be conducted in protocols such as: ‘T’ piece or Pressure Support Ventilator. Weaning failure is frequent because of muscle weakness. Protocol aim is to assess the effects of different weaning protocols in NMD patients receiving invasive MV in weaning success rate, duration of weaning, intensive care unit (ICU) stay, hospital stay and ICU mortality.

**Methods and analysis** A search will be carried in the Cochrane Neuromuscular Specialised Register, MEDLINE, EMBASE, Web of Science, Scopus, United States National Institutes of Health Clinical Trials Registry, ClinicalTrials.gov and WHO International Clinical Trial Registry Portal, of randomised controlled trials (RCTs) and quasi-RCTs. Inclusion criteria of individuals are adults (above 16 years old) and children (from 5 to 16 years old), with clinical diagnosis of NMD (muscular dystrophy, amyotrophic lateral sclerosis, congenital myasthenia, myasthenia gravis, congenital myopathy, spinal muscular atrophy, Guillain Barré Syndrome, severe inherited neuropathies, metabolic myopathies, inflammatory myopathies, mitochondrial diseases) of any gender. All patients ventilated for at least 48 hours due to respiratory failure and clinically considered ready for weaning. Other respiratory or cardiovascular diagnosis associated will not be included. Intervention assessed will be weaning from MV using a protocol with 30 min to 2 hours of spontaneous breathing trial at the end point. All comparisons of different protocols will be considered.

**Ethics and dissemination** Formal ethical approval is not required as primary data will not be collected, since it will be a systematic review. All studies included should have ethical committee approval. The results will be disseminated through a peer-reviewed publication and in conferences and congresses or symposia.

**PROSPERO registration number** CRD42019117393.

## INTRODUCTION

Neuromuscular disease (NMD) can be defined as a chronic and progressive disease, which may present with different clinical

## Strengths and limitations of this study

- This study will help to identify the best way to conduct mechanical ventilation (MV) weaning in patients with neuromuscular diseases (NMD), improving the outcomes of this population when using MV.
- It will be difficult to find articles that meet the inclusion criteria leading to greater difficulty for statistical analysis.
- There are very different approaches in the weaning process of patients with NMD, and that will bring difficult to compare the protocols.
- Too many NMD will need to be included because of NMD heterogeneity.

characteristics, in which its pattern is based on the location where the injury occurs in a motor unit.<sup>1 2</sup> NMD are characterised by progressive muscular impairment, with difficulty in ambulation, swallowing and ventilation, with progressive reduction of vital capacity and increased work of breathing.<sup>3</sup> These changes lead to the development of chronic respiratory insufficiency, which is an important cause of prolonged ventilatory dependence.<sup>4</sup>

Muscle weakness is directly related to weakness of respiratory muscles, especially the diaphragm. Diaphragmatic weakness, often found in patients with NMD causes a reduction in the capacity to generate force, especially when associated with the use of controlled mechanical ventilation.<sup>5</sup>

Intensive care unit (ICU) admission, regardless of the presence of NMD, may be a cause of neuromuscular disorders that lead to muscle impairment.<sup>6</sup> It is estimated that such a condition occurs in up to 62% of critically ill patients in the ICU.<sup>7</sup> The NMD patients experience this respiratory impairment, in general, by a large proportion of motor units that innervate the respiratory muscles affected.<sup>2</sup>

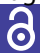

1 Some risk factors such as use of sedatives, malnutrition,  
2 systemic inflammation and prolonged mechanical  
3 ventilation may further impair the neuromuscular perform-  
4 ance of people admitted to ICU.<sup>8</sup>

5 The majority of critically ill patients admitted to ICU  
6 require ventilatory support for acute or chronic respi-  
7 ratory failure,<sup>3</sup> specially the NMD ones. In addition,  
8 the pattern of neuromuscular abnormalities associ-  
9 ated with critical illness, defined as ICU-acquired  
10 weakness (ICUAW),<sup>4</sup> can lead to prolonged mechan-  
11 ical ventilation, a longer hospital stay and increased  
12 ventilation.<sup>4</sup>

13 The emergence of respiratory symptoms, with  
14 progressive hypercapnia, can lead to death from respi-  
15 ratory failure.<sup>3</sup> Long-term invasive or non-invasive  
16 mechanical ventilation is the main intervention for  
17 people who present with acute respiratory acidosis;  
18 progressive decline in vital capacity (<10–15 mL/kg);  
19 or progressive decline in maximal inspiratory pres-  
20 sure (<20–30 cmH<sub>2</sub>O).<sup>3,9</sup>

21 Weaning from mechanical ventilation is the process of  
22 transition to spontaneous ventilation.<sup>10</sup> In people with  
23 NMD, conventional weaning is generally not possible.<sup>11</sup>

24 Weaning difficulty may occur in different popula-  
25 tions, such as elderly with prolonged ICU hospital-  
26 isation, people with chronic respiratory diseases or  
27 NMD.<sup>12</sup> Therefore, the decision to progress to extuba-  
28 tion is more challenging in this group of people with  
29 advanced respiratory muscle weakness, and this can lead  
30 to a need for tracheostomy and prolonged mechanical  
31 ventilation.<sup>4</sup>

32 Difficult weaning can be defined as the requirement  
33 of up to three spontaneous breathing trials (SBT) in a  
34 period of no longer than 7 days of mechanical ventilation  
35 to achieve extubation.<sup>10,13</sup>

36 The weaning process may be conducted in different  
37 protocols such as the following:

- 38 ▶ ‘T’ piece: in which the patient receives only supple-  
39 mental oxygen through a T-shaped tube connected to  
40 an endotracheal tube (orotracheal or tracheostomy).<sup>10</sup>
- 41 ▶ Continuous positive airway pressure (CPAP): the  
42 weaning protocol involves using a continuous pres-  
43 sure, equal to the previous positive end-expiratory  
44 pressure level used before.<sup>10</sup>
- 45 ▶ Pressure support: the use of progressive lower levels  
46 of inspiratory pressure support until it reaches 5–8  
47 cmH<sub>2</sub>O.<sup>10</sup>

48 Successful weaning is defined as the ability to maintain  
49 spontaneous ventilation without the need for reintubation  
50 and invasive mechanical ventilation for 48 hours after extu-  
51 bation.<sup>10</sup> For patients with NMD, due to the difficulty of  
52 weaning, it may be also defined as the absence of a need for  
53 tracheostomy and mechanical ventilation for 5 days after  
54 extubation.<sup>4</sup>

55 Postweaning monitoring should observe whether two  
56 of the following findings are present: respiratory acidosis  
57 (pH <7.35; PaCO<sub>2</sub> >45 mm Hg); SpO<sub>2</sub> <90% or PaO<sub>2</sub> <60  
58 mm Hg with FiO<sub>2</sub> >50%; RR >35 rpm; decreased level of

consciousness, restlessness or excessive sweating; or signs  
suggestive of respiratory muscle fatigue, such as the use  
of accessory muscles or paradoxical movement of the  
abdomen, in order to determinate the need to re-estab-  
lish mechanical ventilation again.<sup>4,10</sup>

Weaning failure from invasive ventilation is frequent  
in people with NMD due to muscle weakness and  
gradual hypercapnia.<sup>4</sup> In this way, the non-invasive ven-  
tilation, even after weaning failure, is an option. And a  
future weaning can be conducted when and if clinically  
possible.<sup>4,12</sup> Although this whole process significantly  
increases health costs with this patient population.

## Objectives

The aim of this systematic review is to assess the effects of  
different weaning protocols in people with NMD receiving  
invasive mechanical ventilation. Our secondary aim is to  
assess how the different protocols affect weaning success,  
duration of weaning, duration of stay in the ICU, duration  
of hospital stay, ICU mortality and also to assess adverse  
effects.

## METHODS

### Eligibility criteria

Studies will be selected according to the criteria outlined  
below.

### Study designs

We will include randomised controlled trials (RCTs) and  
quasi-RCTs (experimental study with participants subjected  
to some type of intervention or control group, and with  
the same outcome of interest measured. But in this kind  
of study, also known as non-randomised trial, populations  
are subjected to any of the groups using other methods of  
allocating, usually not truly random). Other study types,  
such as non-randomised trials, crossover studies and case-  
control studies will be described in the ‘Discussion’ section  
of the review, but they will not be included in the Results  
section. We will include studies reported as full-text, those  
published as abstract only and unpublished data. There will  
be no restrictions as to language.

### Participants

We will consider for inclusion adults (above 16 years  
old) and children (from 5 to 16 years old) people with a  
clinical diagnosis of a NMD (muscular dystrophy of any  
origin including Duchenne muscular dystrophy, amy-  
otrophic lateral sclerosis, congenital myasthenia, myas-  
thenia gravis, congenital myopathy, spinal muscular  
atrophy, Guillian Barré Syndrome, severe inherited  
neuropathies, metabolic myopathies (Pompe disease),  
inflammatory myopathies and mitochondrial diseases)  
of any gender.

We will consider all patients ventilated for at least 48  
hours with orotracheal tube or tracheostomy because  
of acute respiratory failure, and considered by physi-  
cians to be ready for weaning according to clinical



criteria and weaning parameters. No patients with other respiratory or cardiovascular clinical diagnosis associated will be included, nor patients with mixed NMD diagnosis.

If any subset of participants with NMD is analysed, these patients will be included.

### Interventions

The intervention assessed will be the process of weaning from mechanical ventilation in people with NMD using a protocol with criteria for deciding if the patient is ready for extubation with 30 min to 2 hours SBT at the end point of the protocol.

We will consider the following protocols for inclusion.

1. Pressure support ventilation, with gradual reduction of the support pressure.
2. Synchronised intermittent mandatory ventilation, with gradual reduction of respiratory rate and support pressure.
3. CPAP, with gradual reduction of applied pressure.
4. 'T' piece, with progressive increase of spontaneous ventilation time.

### Comparators

We will consider any comparisons of the different protocols.

The protocols will also be compared in relation to the classification of weaning outcomes, in order to identify which protocols develop better outcomes.

- ▶ Simple—successful after first attempt.
- ▶ Difficult—require up to three attempts (or less than 7 days to reach success).
- ▶ Prolonged—require more than 7 days to reach success.

### Outcomes

#### Primary outcome

Weaning success is defined as the ability to maintain spontaneous ventilation without the need for reintubation and invasive mechanical ventilation for 48 hours after extubation.<sup>10</sup>

#### Secondary outcomes

- ▶ Duration of weaning in patients with acute and prolonged mechanical ventilation—defined as the time between the weaning protocol initiation and the moment of extubation.
- ▶ Duration of ICU stay in patients with acute and prolonged mechanical ventilation—defined as the time between ICU admission and ICU discharge.
- ▶ Duration of hospital stay in patients with acute and prolonged mechanical ventilation—defined as the time between hospital admission and hospital discharge.
- ▶ ICU mortality rate in patients with acute and prolonged mechanical ventilation—defined as the mortality rate during ICU stay.
- ▶ Incidence of pneumothorax during mechanical ventilation period.

- ▶ Incidence of ventilation associated pneumonia.

### Language

We will include articles reported in English and other languages. There will be no restrictions.

### Information sources

#### Electronic searches

We will search the Cochrane Neuromuscular Specialised Register (The Cochrane Library, current issues), MEDLINE, EMBASE, Web of Science and Scopus. We will scan conference abstracts for relevant studies.

We will also search the United States National Institutes of Health Clinical Trials Registry, ClinicalTrials.gov (ClinicalTrials.gov) and the WHO International Clinical Trials Registry Portal (apps.who.int/trialsearch/).

We will search all databases from January 2009 to December 2019, and we will impose no restriction on language of publication.

We will identify non-randomised studies for inclusion in the discussion from the same search results.

We will search reference lists of all relevant and included trials and review articles for additional references. We will search for errata or retractions of included trials. We will also search relevant manufacturers' websites for trial information. And we will search grey literature, in reports of technical research and projects related to government programme, to identify other studies.

We will contact study authors of included trials to identify additional trials whether published or unpublished.

If no RCTs or quasi-RCTs in this area are not found, the authors will review other well-designed observational studies, where the population (NMD), intervention (mechanical ventilation weaning) and outcome (weaning success) are clearly documented, in the 'Discussion' section of the review. We will identify these (non-randomised studies) via a search in MEDLINE (from inception to the present), EMBASE (from inception to the present), Web of Science (from inception to the present) and Scopus (from inception to the present). This will be done in order to give a comprehensive descriptive narrative of any non-randomised data.

### Search strategy

Search terms will include: 'neuromuscular disease' or all other terms compatible with clinical diagnoses of these types of diseases, such as 'muscular dystrophy', 'Duchenne muscular dystrophy', 'amyotrophic lateral sclerosis', 'congenital myasthenia', 'myasthenia gravis', 'congenital myopathy', 'spinal muscular atrophy', 'Guillain Barré Syndrome', 'severe inherited neuropathies', 'metabolic myopathies', 'Pompe disease', 'inflammatory myopathies' and 'mitochondrial diseases' combined with 'mechanical ventilation' or 'artificial respiration' or 'mechanical ventilation weaning' or 'ventilator weaning' or 'respirator weaning' and all the combination between them.

An example of the search strategy is available as a online supplementary file.



## Study records

### Selection of studies

Two review authors (SCBN and RTC) will independently screen titles and abstracts of all the potential studies retrieved by the search for inclusion and code them as 'retrieve' (eligible or potentially eligible/unclear) or 'do not retrieve'. We will identify and exclude duplicates and collate multiple reports of the same study so that each study rather than each report is the unit of interest in the review. We will retrieve full-text study reports/publications, and two review authors (SCBN and RTC) will independently screen the full text and identify studies for inclusion, and identify and record reasons for exclusion of the ineligible studies.

We will resolve any disagreements through discussion or, if required, through consultation with a third review author (GAFF).

We will report the selection process in sufficient detail to complete a Preferred Reporting Items for Systematic Review and Meta-Analysis Protocols flow diagram and 'Characteristics of excluded studies' table.

### Data extraction and management

We will use a data extraction form that we will initially pilot on at least one trial included in the review to collect study characteristics and outcome data. One review author (SCBN) will extract study characteristics from included trials. We will collect information on study design and setting, participant characteristics (including disease severity and age), study eligibility criteria, details of the intervention(s) given, the outcomes assessed, the source of study funding and any conflicts of interest stated by the investigators.

Two review authors (SCBN and RTC) will independently extract outcome data from included trials. We will note in the 'Characteristics of included studies' table if the trials did not report outcome data in a usable way. We will resolve any disagreements by consensus or consult a third review author (GAFF). One review author (SCBN) will transfer data into Review Manager (RevMan) V.5.3.<sup>14</sup> A second review author (RTC) will check the outcome data entries.

The same review author (RTC) will spot-check study characteristics for accuracy against the trial report. When reports require translation, the translator will extract data directly using a data extraction form. To minimise bias in the review process, the review authors will not screen studies for inclusion, extract data, or assess the risk of bias in trials they themselves have authored. In such circumstances, we will involve a third review author (GAFF).

### Risk of bias individual studies

Two review authors (SCBN and RTC) will independently assess risk of bias for each study using the criteria outlined in the Cochrane Handbook for Systematic Reviews of Interventions.<sup>15</sup> These authors will resolve disagreements by discussion or by involving another review author (GAFF).

We will assess the risk of bias according to the following domains:

1. Random sequence generation.
2. Allocation concealment.
3. Blinding of participants and personnel.
4. Blinding of outcome assessment.
5. Incomplete outcome data.
6. Selective outcome reporting.
7. Other bias.

We will grade each potential source of bias as high, low or unclear and provide a quote from the study report together with a justification for our judgement in the 'Risk of bias' table. We will summarise the risk of bias judgements across different studies for each of the domains listed. We will consider blinding separately for different key outcomes where necessary (eg, for unblinded outcome assessment, risk of bias for all-cause mortality may be very different than for a patient-reported pain scale). Where information on risk of bias relates to unpublished data or correspondence with a trialist, we will note this in the 'Risk of bias' table. When considering treatment effects, we will take into account the risk of bias for the studies that contribute to that outcome.

If we are able to pool a sufficient number of studies, that is, more than 10 trials,<sup>15</sup> we will create and examine a funnel plot to explore possible small study biases.

## Data synthesis

### Measures of treatment effect

We will analyse dichotomous data as risk ratios (RR) with corresponding 95% CI and continuous data as mean difference (MD) with 95% CI, or as standardised mean difference with 95% CI for results across studies with outcomes that are conceptually the same but measured in different ways. We will enter data presented as a scale with a consistent direction of effect.

We will undertake meta-analyses only where this is meaningful, that is if the treatments, participants and the underlying clinical question are similar enough for pooling to make sense. This will be identified if there are two or more trials with comparable populations and interventions.

Where a single trial reports multiple trial arms, we will include only the arms relevant to the review question.

All data will be pooled according to age group, dividing them into two groups (adults—over 16 years old, and children—between 5 and 16 years old). After this grouping, the analysis will be done, first, comparing the success rate and failure rate in each of the groups. Subsequently, the data will also be evaluated taking into consideration the weaning outcomes in simple, difficult and prolonged (as described in the types of interventions).

### Unit of analysis issues

We do not expect to have any crossover or cluster randomised controlled trials, since weaning is a one-off event and also due to the lack of control group, since all

patients are submitted to the same intervention, which is weaning from mechanical ventilation.

If we are able to find cluster randomised controlled trials with different clusters of different NMD, we will conduct this analysis.

### Assessment of heterogeneity

We will use the  $I^2$  statistic to measure heterogeneity among the trials in each analysis. If we identify substantial unexplained heterogeneity, we will report random-effects results and explore possible causes by prespecified subgroup analysis.

We will be following the rough guide to interpretation outlined in the Cochrane Handbook for Systematic Reviews of Interventions.

- ▶ 0%–40%: might not be important;
- ▶ 30%–60%: may represent moderate heterogeneity;
- ▶ 50%–90%: may represent substantial heterogeneity and
- ▶ 75%–100%: considerable heterogeneity.

### Data synthesis

If the review includes more than one comparison that cannot be included in the same analysis, we will report the results for each comparison separately.

### 'Summary of findings' table

- ▶ We will create a 'Summary of findings' table using the following outcomes.
- ▶ Weaning success.
- ▶ Duration of weaning (time difference between weaning protocol initiation and the moment of extubation moment).
- ▶ Duration of ICU stay.
- ▶ Duration of hospital stay.
- ▶ ICU mortality rate in patients with acute and prolonged mechanical ventilation—defined as the mortality rate during ICU stay.
- ▶ Incidence of pneumothorax during mechanical ventilation period.
- ▶ Incidence of ventilation associated pneumonia.

We will use the five GRADE considerations (study limitations, consistency of effect, imprecision, indirectness and publication bias) to assess the quality of a body of evidence (studies that contribute data for the prespecified outcomes). We will use methods and recommendations described in the Cochrane Handbook for Systematic Reviews of Interventions<sup>15</sup> using GRADEpro software (GRADEpro GDT). We will justify all decisions to downgrade or upgrade the quality of studies using footnotes, and we will make comments to aid readers' understanding of the review where necessary. Two authors will independently grade the quality of the evidence. They will resolve disagreements by discussion and by consultation with a third review author.

### Subgroup analysis and investigation of heterogeneity

- ▶ We plan to perform the following subgroup analyses.
- ▶ Simple weaning: successful after first attempt.

- ▶ Difficult weaning: require up to three attempts.
- ▶ Prolonged weaning: require more than 7 days to reach success.
- ▶ Children: from 5 to 16 years old.
- ▶ Adults: above 16 years old.

We will use both primary and secondary outcome measures in all subgroup analyses. We will use the formal test for subgroup interactions in Review Manager V.5.3.<sup>14</sup>

### Sensitivity analysis

We plan to undertake the following sensitivity analyses.

3wRepeat the analysis by excluding studies at high risk of bias (sequence generation, allocation concealment, blinding of personnel, outcome assessment and attrition).

If there are one or more very large trials, we will repeat the analysis by excluding them to examine how much they dominate the results.

### Reaching conclusions

We will base our review conclusions only on findings from the quantitative or narrative synthesis of included trials. We will avoid making recommendations for practice. Our implications for research will suggest priorities for future research and outline the remaining uncertainties in the area.

### Patient and public involvement

In the present protocol of systematic review and in the subsequent systematic review, there will be no involvement of patients or public.

The paper proposes to use results previously authorised and published by other authors, without there being any need for patient or public involvement. The research question was developed based on the questions raised by other authors, most of the time according to the clinical difficulty and necessity of improving the weaning protocols for this population.

The results of the present study will be published in indexed journal so it can be available for NMD patients, in general, and public, specially health professionals.

### CONCLUSION

This systematic review will provide evidence in different weaning protocols that can be applied to the NMD patients, analysing the weaning success rate, leading to extubation. The hypothesis is that one specific protocol has higher success weaning rates.

Where sufficient data are available, we will conduct a meta-analysis to confirm the relationship between the different protocols and duration of weaning, duration of stay in the ICU, duration of hospital stay and ICU mortality. It will also be able to assess adverse effects of weaning protocols that fail to lead to extubation.

Moreover, if the hypothesis is confirmed, the review will clarify the reasons any weaning strategy interfere to higher success weaning rates.





Overall, the review will complement the evidence based on mechanical ventilation weaning for NMD patients.

**Contributors** SCBN: screen titles, abstracts and full text to identify studies for inclusion or exclusion; extract study characteristics; extract outcome data; transfer data into RevMan; assess risk of bias. RTC: screen titles, abstracts and full text to identify studies for inclusion or exclusion; extract outcome data; check outcome data entries; spot-check study characteristics for accuracy; assess risk of bias. IL: development of the text; statistical analysis and revision of the final text. VRR: development of the text; statistical analysis, revision of the final text. GAFF: discussion about the disagreements the two authors have in any issues; screen studies the other two authors have authored.

**Funding** The authors have not declared a specific grant for this research from any funding agency in the public, commercial or not-for-profit sectors.

**Competing interests** None declared.

**Patient consent for publication** Not required.

**Provenance and peer review** Not commissioned; externally peer reviewed.

**Open access** This is an open access article distributed in accordance with the Creative Commons Attribution Non Commercial (CC BY-NC 4.0) license, which permits others to distribute, remix, adapt, build upon this work non-commercially, and license their derivative works on different terms, provided the original work is properly cited, appropriate credit is given, any changes made indicated, and the use is non-commercial. See: <http://creativecommons.org/licenses/by-nc/4.0/>.

#### ORCID iD

Saint Clair Gomes Bernardes Neto <http://orcid.org/0000-0001-5089-0564>

#### REFERENCES

- Anziska Y, Sternberg A. Exercise in neuromuscular disease. *Muscle Nerve* 2013;48:3–20.
- Rezania K, Goldenberg FD, White S. Neuromuscular disorders and acute respiratory failure: diagnosis and management. *Neurol Clin* 2012;30:161–85.
- Ambrosino N, Carpenè N, Gherardi M. Chronic respiratory care for neuromuscular diseases in adults. *Eur Respir J* 2009;34:444–51.
- Kim SM, Kang S-W, Choi Y-C, et al. Successful extubation after weaning failure by noninvasive ventilation in patients with neuromuscular disease: case series. *Ann Rehabil Med* 2017;41:450–5.
- Vassilakopoulos T, Petrof BJ. Ventilator-Induced diaphragmatic dysfunction. *Am J Respir Crit Care Med* 2004;169:336–41.
- Bach JR, Gonçalves MR, Hamdani I, et al. Extubation of patients with neuromuscular weakness. *Chest* 2010;137:1033–9.
- Epstein SK, Ciubotaru RL. Independent effects of etiology of failure and time to reintubation on outcome for patients failing extubation. *Am J Respir Crit Care Med* 1998;158:489–93.
- Hermans G, Van den Berghe G. Clinical review: intensive care unit acquired weakness. *Critical Care* 2015;19:274–83.
- Chevrolet JC, Deléamont P. Repeated vital capacity measurements as predictive parameters for mechanical ventilation need and weaning success in the Guillain-Barré syndrome. *Am Rev Respir Dis* 1991;144:814–8.
- Zein H, Baratloo A, Negida A, et al. Ventilator weaning and spontaneous breathing trials; an educational review. *Emerg* 2016;4:65–71.
- Fan E, Cheek F, Chlan L, et al. An official American thoracic Society clinical practice guideline: the diagnosis of intensive care unit-acquired weakness in adults. *Am J Respir Crit Care Med* 2014;190:1437–46.
- Tsara V, Moisiadis N, Antoniadou M, et al. Characteristics and outcome of patients with difficult weaning from mechanical ventilation: an 18 years' experience of a respiratory intermediate unit attached to a pulmonary department. *Hippokratia* 2015;19:37–40.
- Sklar MC, Burns K, Rittayamai N, et al. Effort to breathe with various spontaneous breathing trial techniques. A physiologic meta-analysis. *Am J Respir Crit Care Med* 2017;195:1477–85.
- The Cochrane Collaboration. Review Manager (RevMan) [Computer program]. Version 5.3. Copenhagen The Nordic Cochrane Centre; 2014.
- Higgins JPT, Green S, The Cochrane Collaboration. Cochrane Handbook for systematic reviews of interventions. version 5.1.0, 2011. Available: [www.cochrane-handbook.org](http://www.cochrane-handbook.org)

## Search strategy for MEDLINE

- 1 - exp Neuromuscular Diseases/co, di, mo, nu, pa, ph, pp, pc, rh, th [Complications, Diagnosis, Mortality, Nursing, Pathology, Physiology, Physiopathology, Prevention & Control, Rehabilitation, Therapy]
- 2 - Myotonic Dystrophy/ or Muscular Dystrophy, Duchenne/ or dystrophy.mp. - [46861](#)
- 3 - muscular dystrophy.mp. or exp Muscular Dystrophies/ - [32736](#)
- 4 - Myasthenia Gravis/ or myasthenia.mp. - [17216](#)
- 5 - congenital myasthenia.mp. or exp Myasthenic Syndromes, Congenital/ - [654](#)
- 6 - myopathy.mp. or \*Muscular Diseases/ - [31947](#)
- 7 - Myopathies, Structural, Congenital/ or congenital myopathy.mp. - [1225](#)
- 8 - inflammatory myopathy.mp. or \*Myositis/ - [7195](#)
- 9 - metabolic myopathy.mp. or Mitochondrial Myopathies/ - [1972](#)
- 10 - pompe disease.mp. - [1063](#)
- 11 - spinal muscular atrophy.mp. or exp Muscular Atrophy, Spinal/ - [6338](#)
- 12 - Polyradiculoneuropathy/ or exp Guillain-Barre Syndrome/ or guillian barre.mp. or Polyneuropathies/ - [13731](#)
- 13 - Peripheral Nervous System Diseases/ or severe inherited neuropathy.mp. - [22861](#)
- 14 - amyotrophic lateral sclerosis.mp. or exp Amyotrophic Lateral Sclerosis/ - [24339](#)
- 15 - 1 or 2 or 3 or 4 or 5 or 6 or 7 or 8 or 9 or 10 or 11 or 12 or 13 or 14 - [270807](#)
- 16 - Positive-Pressure Respiration/ or Respiration, Artificial/ or Ventilator Weaning/ - [65155](#)
- 17 - Weaning/ or weaning.mp. - [33982](#)
- 18 - Airway Extubation/ or spontaneous breathing trial.mp. - [1798](#)
- 19 - 16 or 17 or 18 - [95029](#)
- 20 - 15 and 19

## Search strategy for EMBASE

- #1 - 'neuromuscular disease' OR 'muscular dystrophy' OR myasthenia OR myopathy OR 'glycogen storage disease type 2' OR 'muscle atrophy' OR polyradiculoneuropathy OR 'peripheral neuropathy' OR 'amyotrophic lateral sclerosis' - [159,527](#)
- #2 - 'artificial ventilation' OR 'ventilator weaning' OR extubation OR 'spontaneous breathing trial' - [5,215](#)
- #3 - #1 AND #2 AND [2009-2020]/py

## Search strategy for WEB OF SCIENCE

#1 - Todos os campos: (neuromuscular disease) OR Todos os campos: (muscular dystrophy) OR Todos os campos: (myasthenia) OR Todos os campos: (myopathy) OR Todos os campos: (glycogen storage disease type 2) OR Todos os campos: (muscle atrophy) OR Todos os campos: (polyradiculoneuropathy) OR Todos os campos: (peripheral neuropathy) OR Todos os campos: (amyotrophic lateral sclerosis) Índices=SCI-EXPANDED, SSCI, A&HCI, CPCI-S, CPCI-SSH, ESCI Tempo estipulado=2009-2020 - [100.078](#)

#2 - Todos os campos: (artificial ventilation) OR Todos os campos: (ventilator weaning) OR Todos os campos: (extubation) OR Todosos campos: (spontaneous breathing trial) Índices=SCI-EXPANDED, SSCI, A&HCI, CPCI-S, CPCI-SSH, ESCI Tempo estipulado=2009-2020 - 9.840

#3 - #1 AND #2 - Índices=SCI-EXPANDED, SSCI, A&HCI, CPCI-S, CPCI-SSH, ESCI Tempo estipulado=2009-2020

## Search strategy for SCOPUS

('artificial AND ventilation' OR 'ventilator AND weaning' OR extubation OR 'spontaneous AND breathing AND trial' ) AND ( 'neuromuscular AND disease' OR 'muscular AND dystrophy' OR myasthenia OR myopathy OR 'glycogen AND storage AND disease AND type AND 2' OR 'muscle AND atrophy' OR polyradiculoneuropathy OR 'peripheral AND neuropathy' OR 'amyotrophic AND lateral AND sclerosis' ) AND ( LIMIT-TO ( PUBYEAR , 2020 ) OR LIMIT-TO ( PUBYEAR , 2019 ) OR LIMIT-TO ( PUBYEAR , 2018 ) OR LIMIT-TO ( PUBYEAR , 2017 ) OR LIMIT-TO ( PUBYEAR , 2016 ) OR LIMIT-TO ( PUBYEAR , 2015 ) OR LIMIT-TO ( PUBYEAR , 2014 ) OR LIMIT-TO ( PUBYEAR , 2013 ) OR LIMIT-TO ( PUBYEAR , 2012 ) OR LIMIT-TO ( PUBYEAR , 2011 ) OR LIMIT-TO ( PUBYEAR , 2010 ) OR LIMIT-TO ( PUBYEAR , 2009 ) )

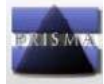

# PRISMA 2009 Checklist

| Section/topic                      | #  | Checklist item                                                                                                                                                                                                                                                                                              | Reported on page # |
|------------------------------------|----|-------------------------------------------------------------------------------------------------------------------------------------------------------------------------------------------------------------------------------------------------------------------------------------------------------------|--------------------|
| <b>TITLE</b>                       |    |                                                                                                                                                                                                                                                                                                             |                    |
| Title                              | 1  | Identify the report as a systematic review, meta-analysis, or both.                                                                                                                                                                                                                                         | 1                  |
| <b>ABSTRACT</b>                    |    |                                                                                                                                                                                                                                                                                                             |                    |
| Structured summary                 | 2  | Provide a structured summary including, as applicable: background; objectives; data sources; study eligibility criteria, participants, and interventions; study appraisal and synthesis methods; results; limitations; conclusions and implications of key findings; systematic review registration number. | 1-2                |
| <b>INTRODUCTION</b>                |    |                                                                                                                                                                                                                                                                                                             |                    |
| Rationale                          | 3  | Describe the rationale for the review in the context of what is already known.                                                                                                                                                                                                                              | 2-4                |
| Objectives                         | 4  | Provide an explicit statement of questions being addressed with reference to participants, interventions, comparisons, outcomes, and study design (PICOS).                                                                                                                                                  | 4                  |
| <b>METHODS</b>                     |    |                                                                                                                                                                                                                                                                                                             |                    |
| Protocol and registration          | 5  | Indicate if a review protocol exists, if and where it can be accessed (e.g., Web address), and, if available, provide registration information including registration number.                                                                                                                               | 4                  |
| Eligibility criteria               | 6  | Specify study characteristics (e.g., PICOS, length of follow-up) and report characteristics (e.g., years considered, language, publication status) used as criteria for eligibility, giving rationale.                                                                                                      | 4-7                |
| Information sources                | 7  | Describe all information sources (e.g., databases with dates of coverage, contact with study authors to identify additional studies) in the search and date last searched.                                                                                                                                  | 7                  |
| Search                             | 8  | Present full electronic search strategy for at least one database, including any limits used, such that it could be repeated.                                                                                                                                                                               | Sup.2              |
| Study selection                    | 9  | State the process for selecting studies (i.e., screening, eligibility, included in systematic review, and, if applicable, included in the meta-analysis).                                                                                                                                                   | 7-8                |
| Data collection process            | 10 | Describe method of data extraction from reports (e.g., piloted forms, independently, in duplicate) and any processes for obtaining and confirming data from investigators.                                                                                                                                  | 7-8                |
| Data items                         | 11 | List and define all variables for which data were sought (e.g., PICOS, funding sources) and any assumptions and simplifications made.                                                                                                                                                                       | N/A                |
| Risk of bias in individual studies | 12 | Describe methods used for assessing risk of bias of individual studies (including specification of whether this was done at the study or outcome level), and how this information is to be used in any data synthesis.                                                                                      | N/A                |
| Summary measures                   | 13 | State the principal summary measures (e.g., risk ratio, difference in means).                                                                                                                                                                                                                               | N/A                |
| Synthesis of results               | 14 | Describe the methods of handling data and combining results of studies, if done, including measures of consistency (e.g., $I^2$ ) for each meta-analysis.                                                                                                                                                   | N/A                |

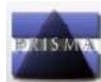

# PRISMA 2009 Checklist

| Section/topic                 | #  | Checklist item                                                                                                                                                                                           | Reported on page # |
|-------------------------------|----|----------------------------------------------------------------------------------------------------------------------------------------------------------------------------------------------------------|--------------------|
| Risk of bias across studies   | 15 | Specify any assessment of risk of bias that may affect the cumulative evidence (e.g., publication bias, selective reporting within studies).                                                             | N/A                |
| Additional analyses           | 16 | Describe methods of additional analyses (e.g., sensitivity or subgroup analyses, meta-regression), if done, indicating which were pre-specified.                                                         | N/A                |
| <b>RESULTS</b>                |    |                                                                                                                                                                                                          |                    |
| Study selection               | 17 | Give numbers of studies screened, assessed for eligibility, and included in the review, with reasons for exclusions at each stage, ideally with a flow diagram.                                          | 8                  |
| Study characteristics         | 18 | For each study, present characteristics for which data were extracted (e.g., study size, PICOS, follow-up period) and provide the citations.                                                             | N/A                |
| Risk of bias within studies   | 19 | Present data on risk of bias of each study and, if available, any outcome level assessment (see item 12).                                                                                                | N/A                |
| Results of individual studies | 20 | For all outcomes considered (benefits or harms), present, for each study: (a) simple summary data for each intervention group (b) effect estimates and confidence intervals, ideally with a forest plot. | N/A                |
| Synthesis of results          | 21 | Present results of each meta-analysis done, including confidence intervals and measures of consistency.                                                                                                  | N/A                |
| Risk of bias across studies   | 22 | Present results of any assessment of risk of bias across studies (see Item 15).                                                                                                                          | N/A                |
| Additional analysis           | 23 | Give results of additional analyses, if done (e.g., sensitivity or subgroup analyses, meta-regression [see Item 16]).                                                                                    | N/A                |
| <b>DISCUSSION</b>             |    |                                                                                                                                                                                                          |                    |
| Summary of evidence           | 24 | Summarize the main findings including the strength of evidence for each main outcome; consider their relevance to key groups (e.g., healthcare providers, users, and policy makers).                     | 9-12               |
| Limitations                   | 25 | Discuss limitations at study and outcome level (e.g., risk of bias), and at review-level (e.g., incomplete retrieval of identified research, reporting bias).                                            | 12                 |
| Conclusions                   | 26 | Provide a general interpretation of the results in the context of other evidence, and implications for future research.                                                                                  | 12-13              |
| <b>FUNDING</b>                |    |                                                                                                                                                                                                          |                    |
| Funding                       | 27 | Describe sources of funding for the systematic review and other support (e.g., supply of data); role of funders for the systematic review.                                                               | 13-14              |

From: Moher D, Liberati A, Tetzlaff J, Altman DG, The PRISMA Group (2009). Preferred Reporting Items for Systematic Reviews and Meta-Analyses: The PRISMA Statement. PLoS Med 6(7): e1000097. doi:10.1371/journal.pmed1000097

For more information, visit: [www.prisma-statement.org](http://www.prisma-statement.org).
